# Supplementary material
Source: PubMed Central journal article supplement (PMC11223672)

# TATA

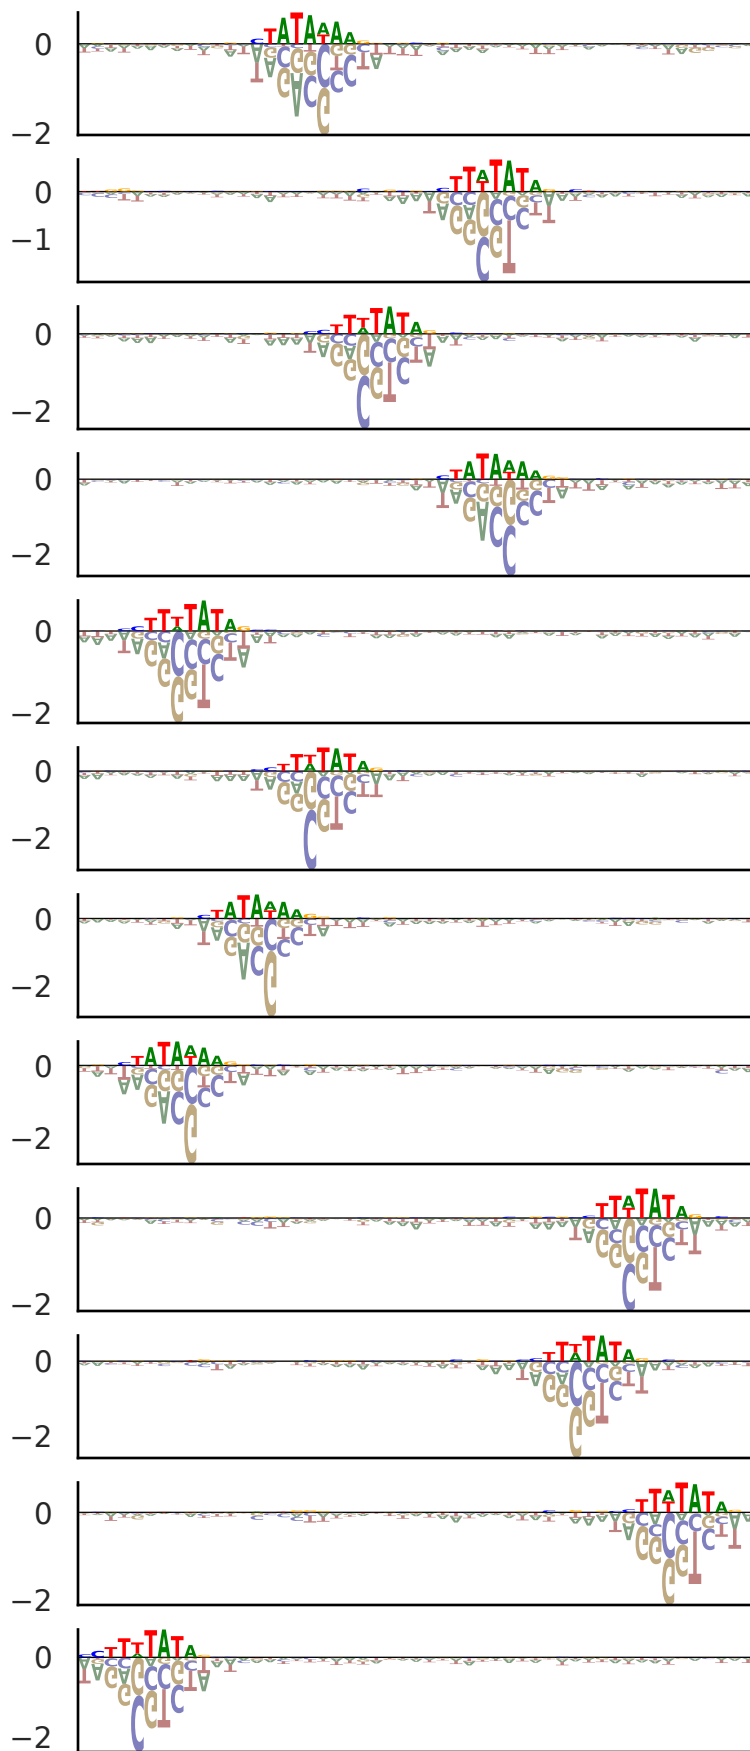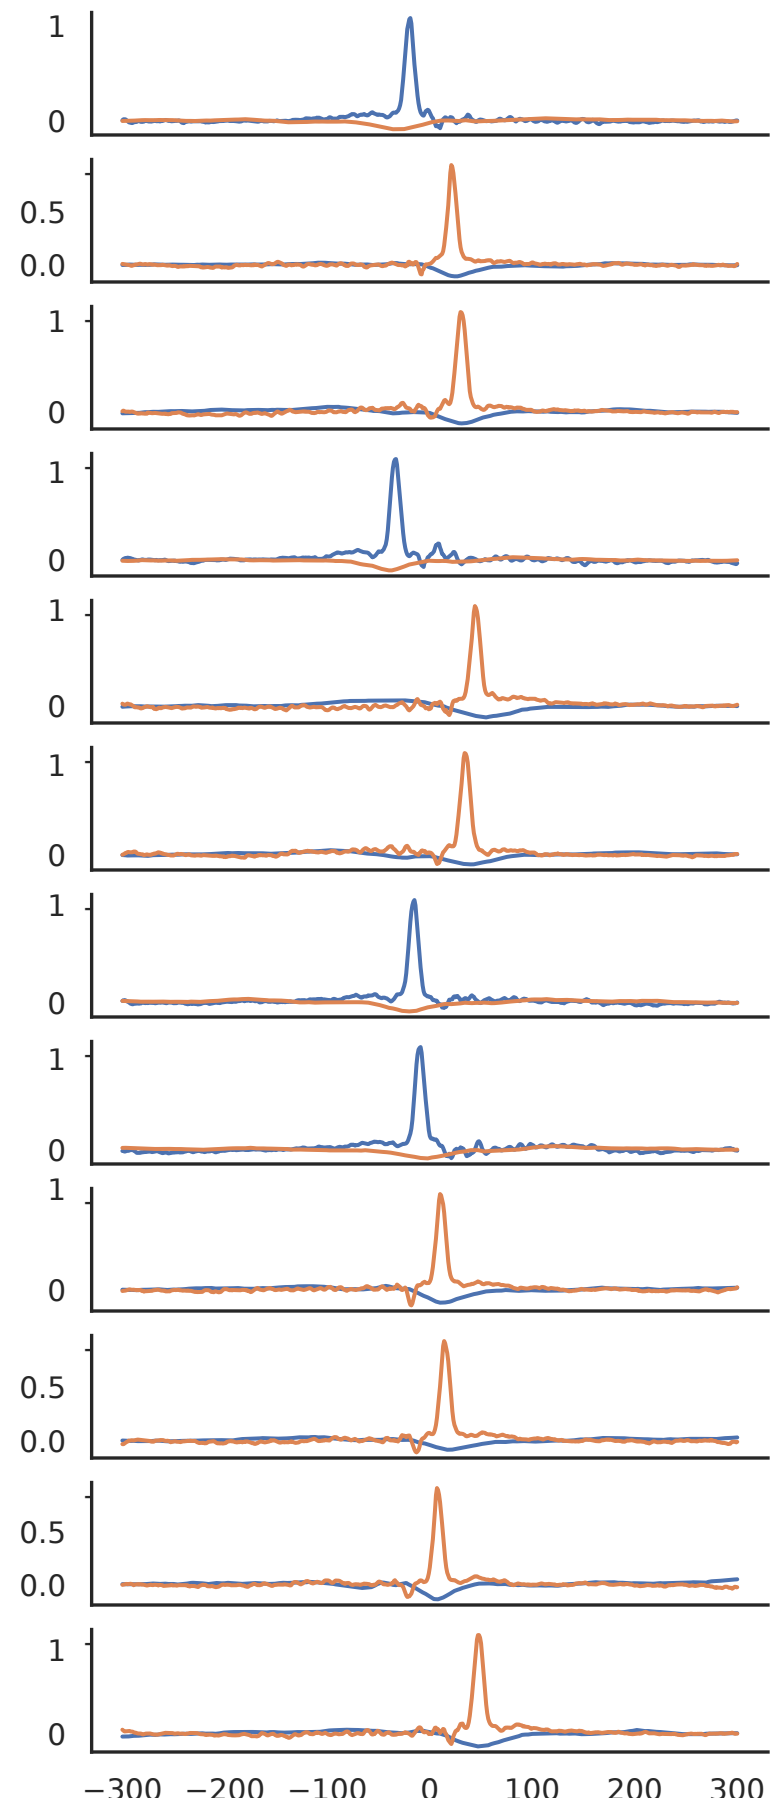

YY1

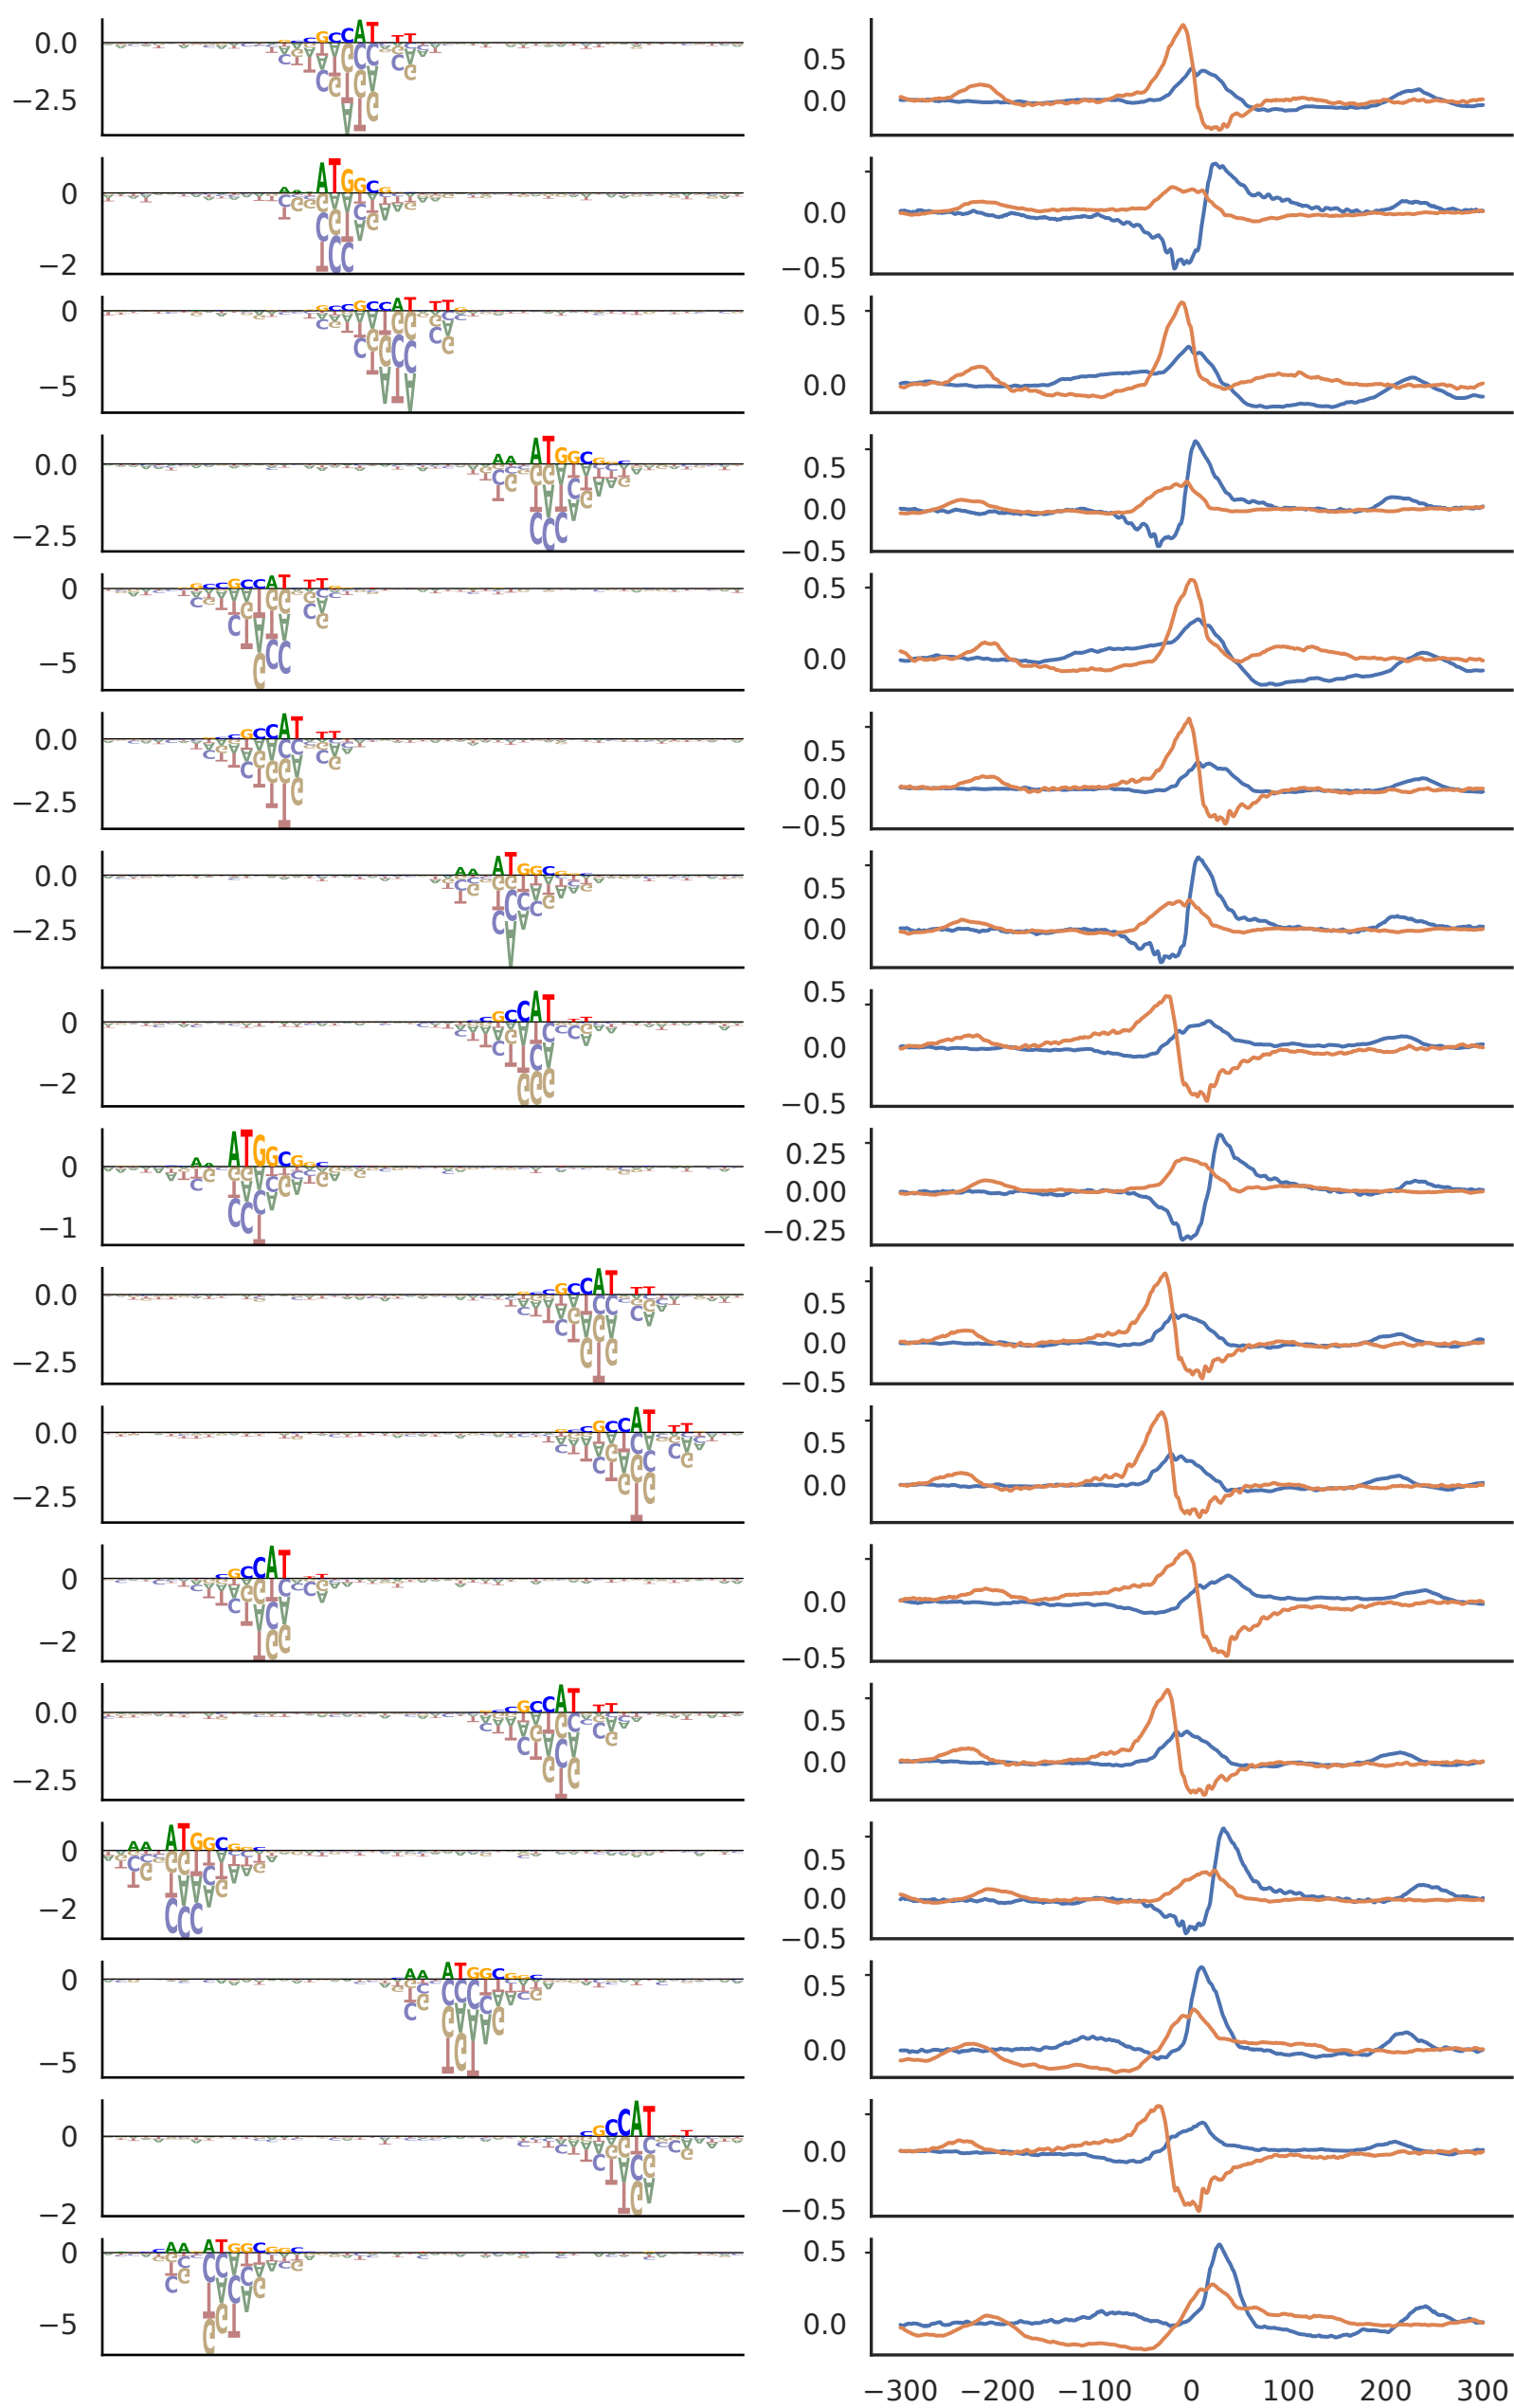

# NFY

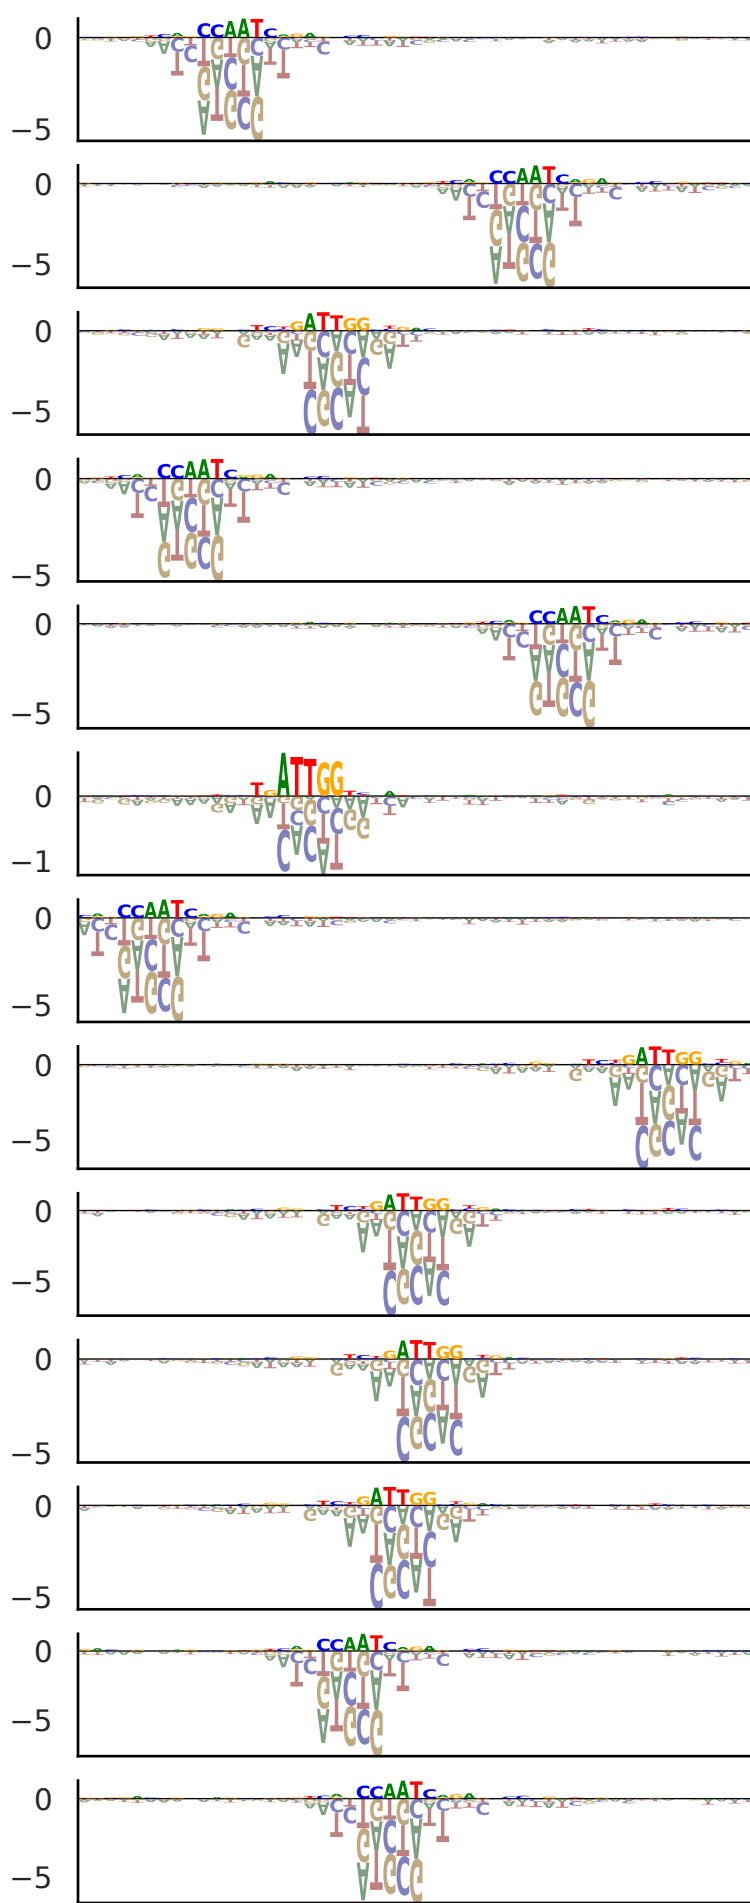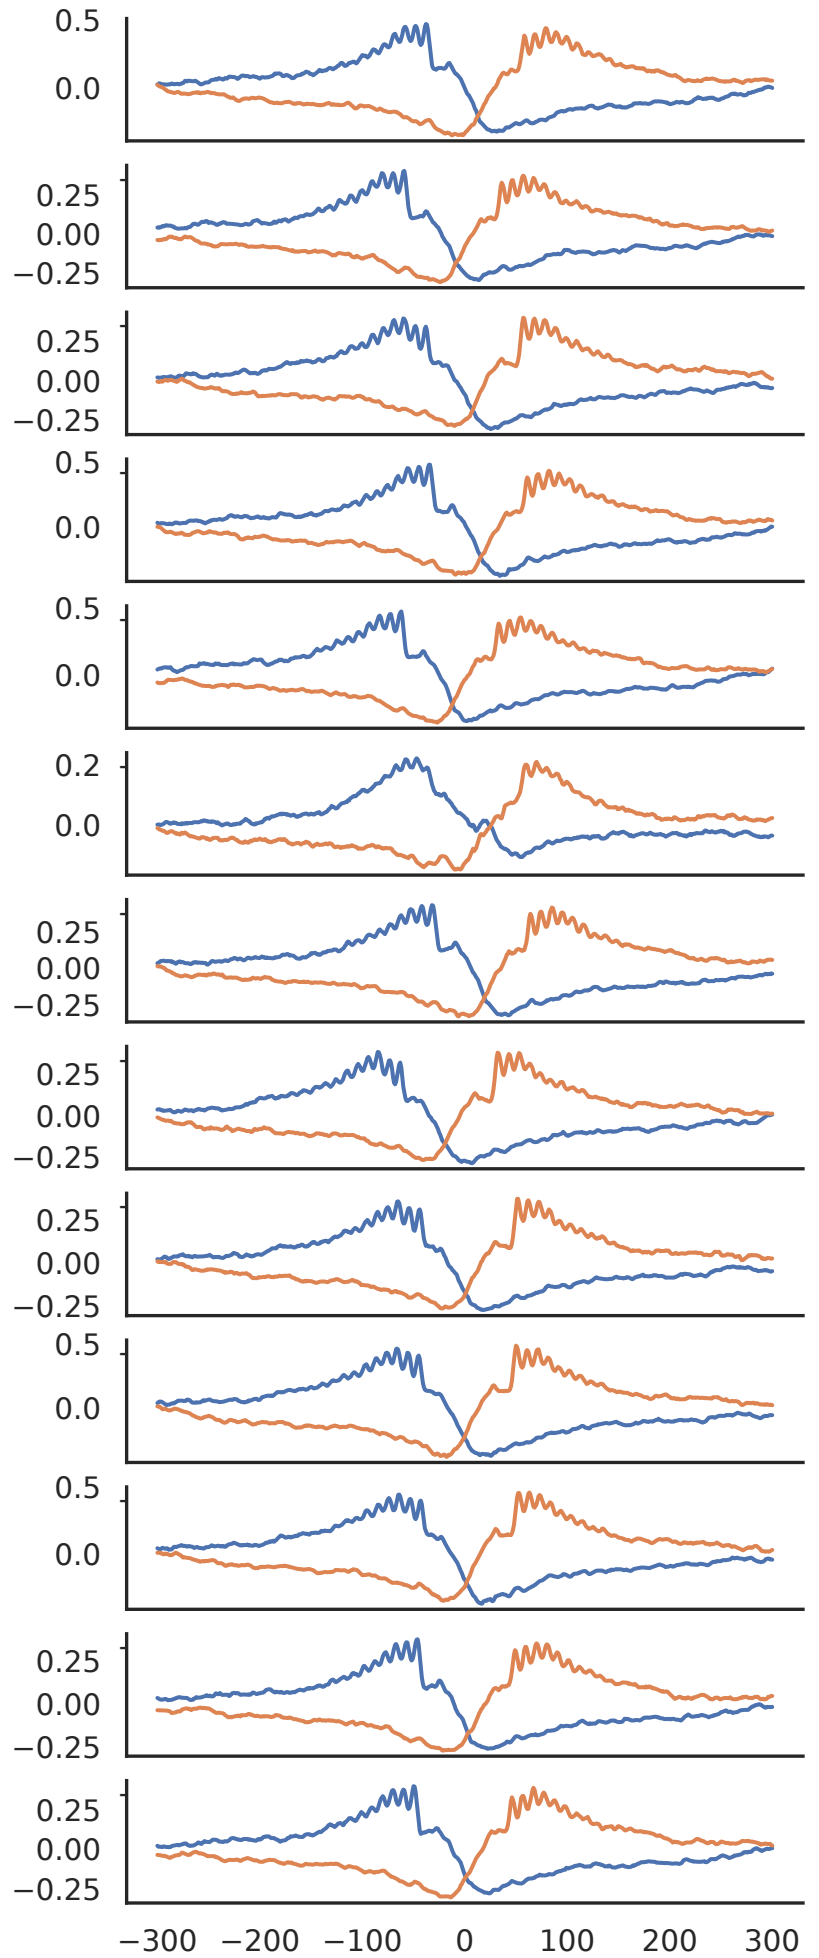

# ETS

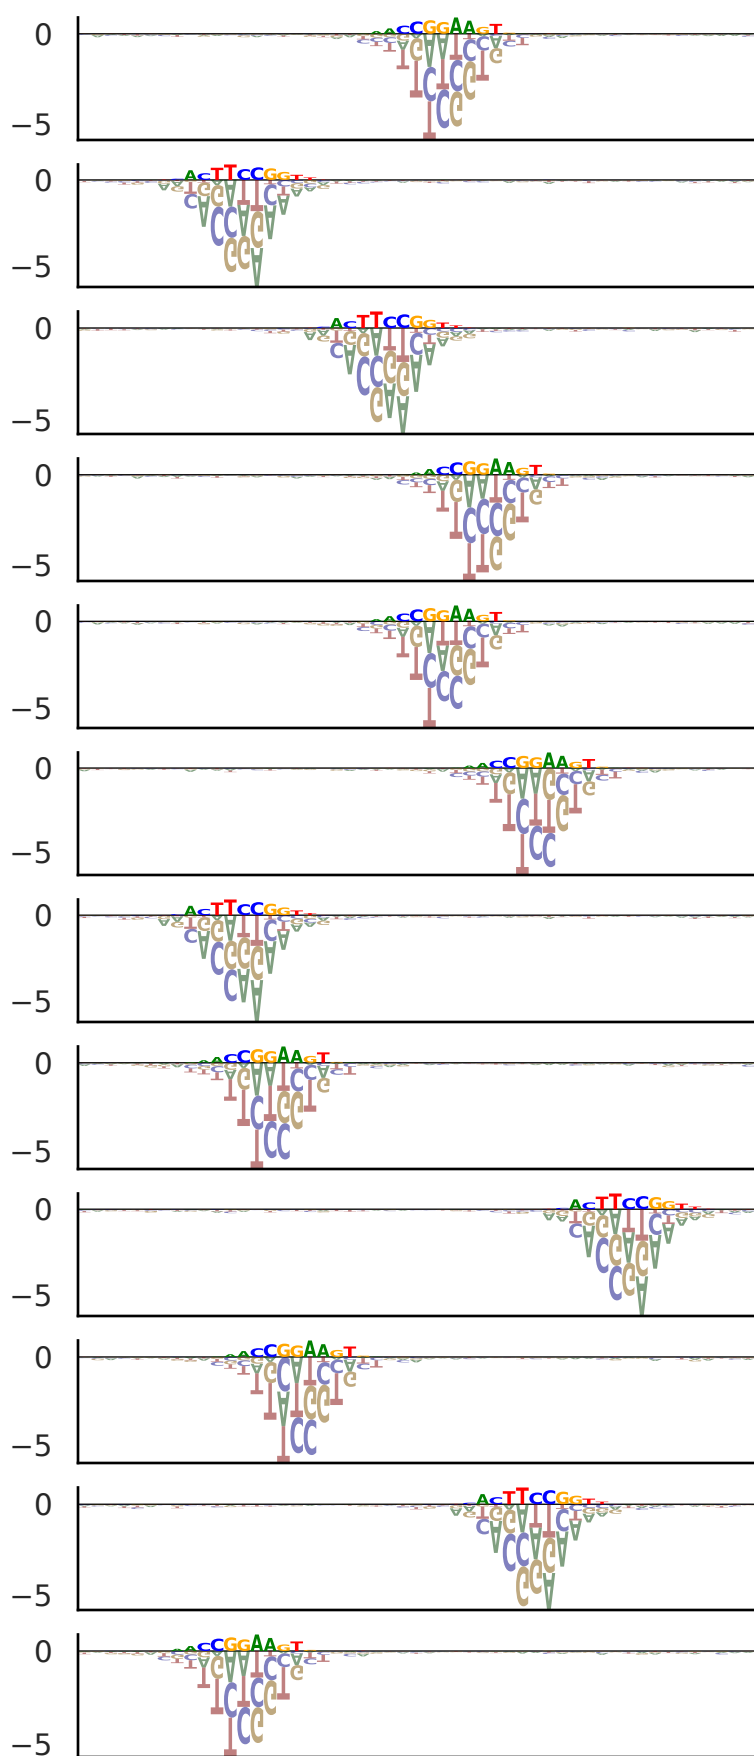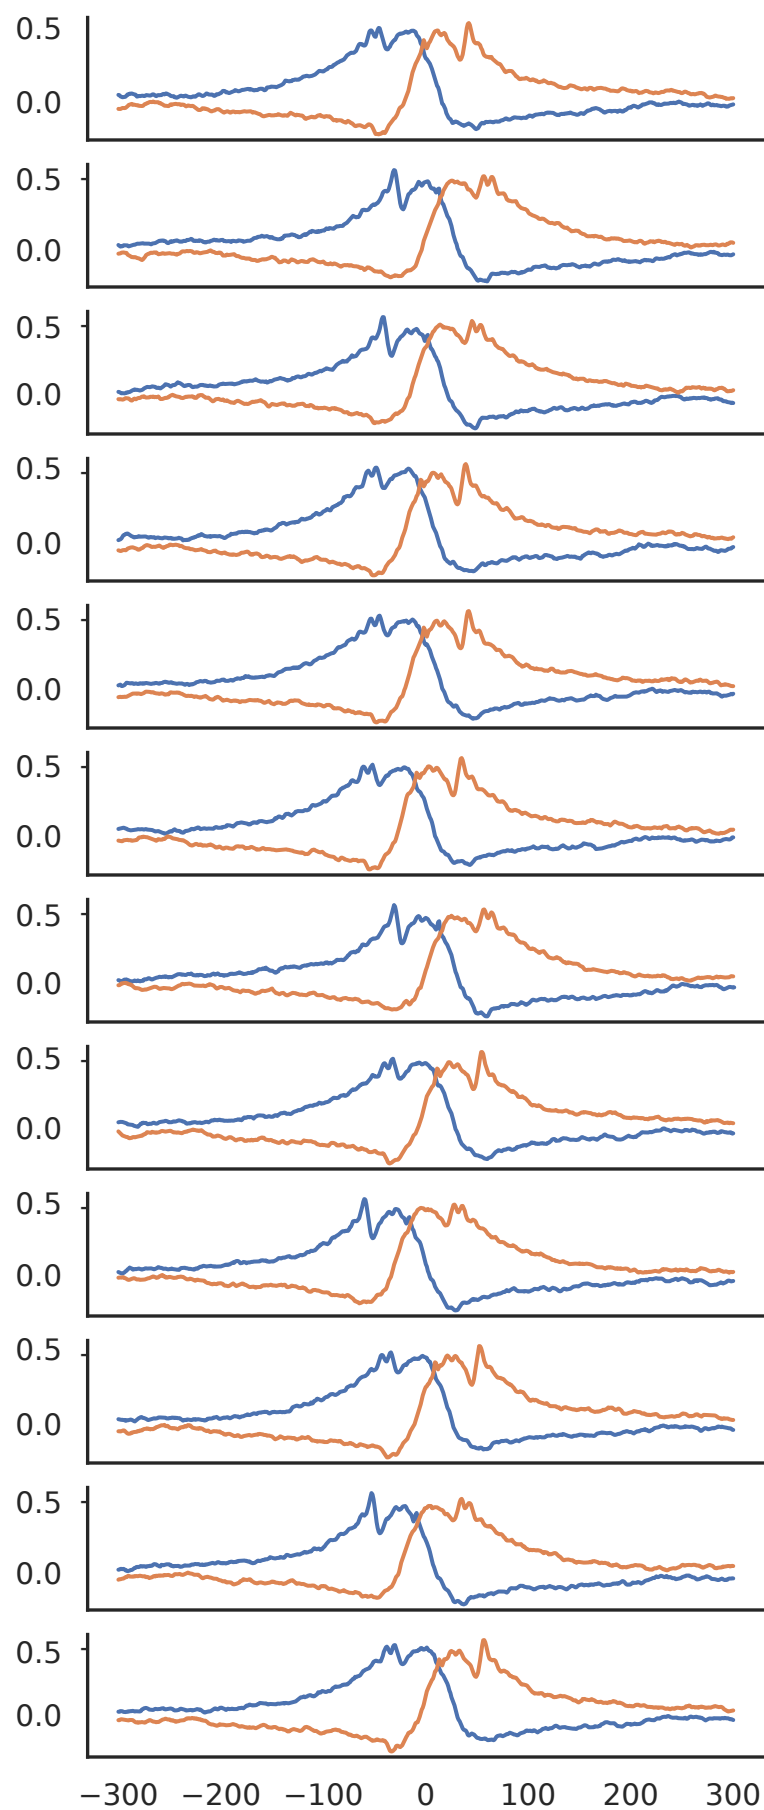

SP

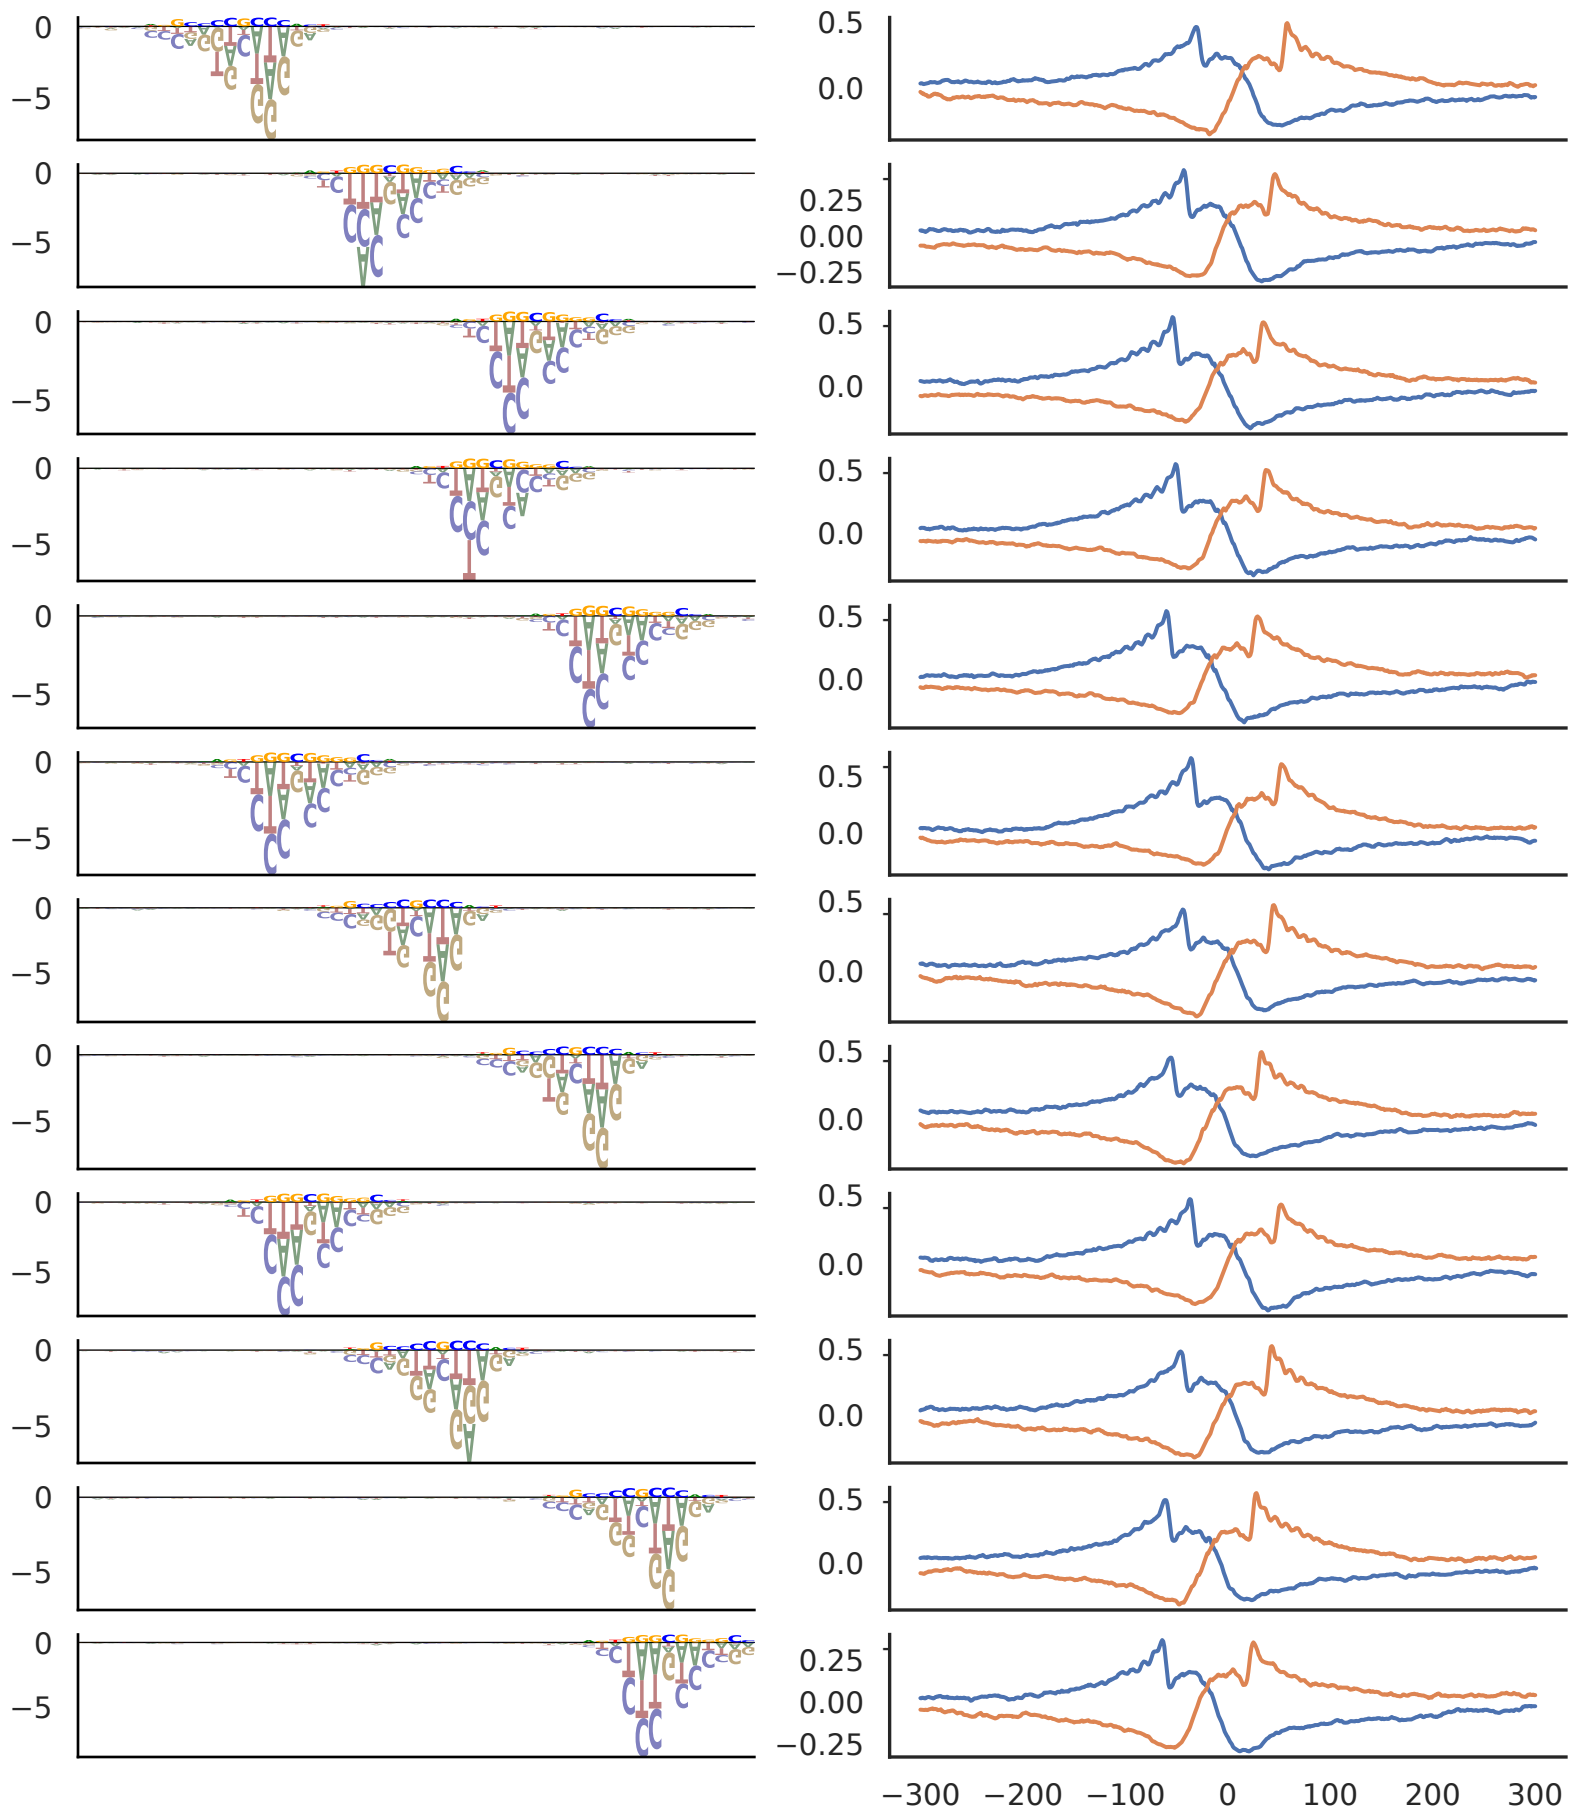

# ZNF143

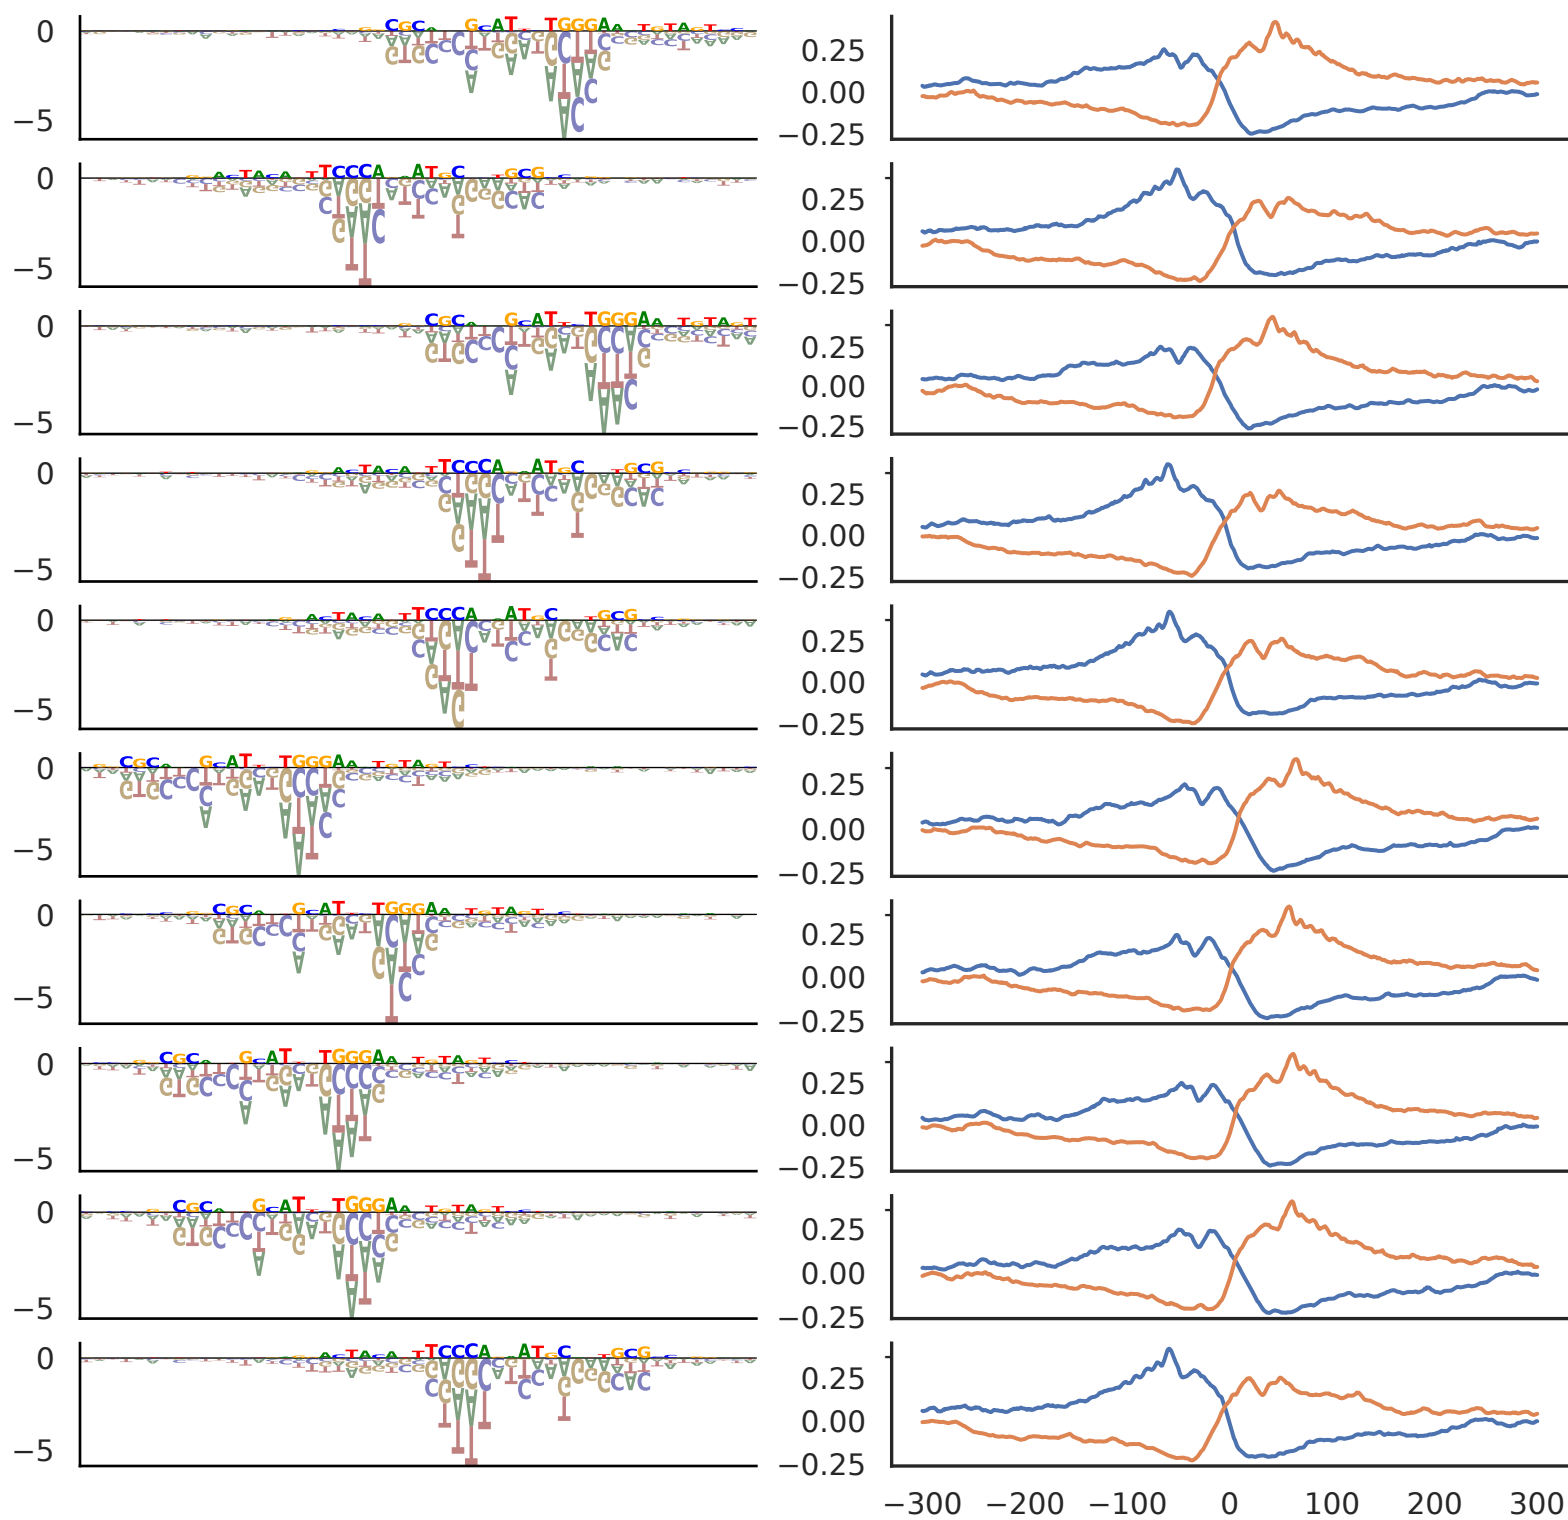

# NRF1

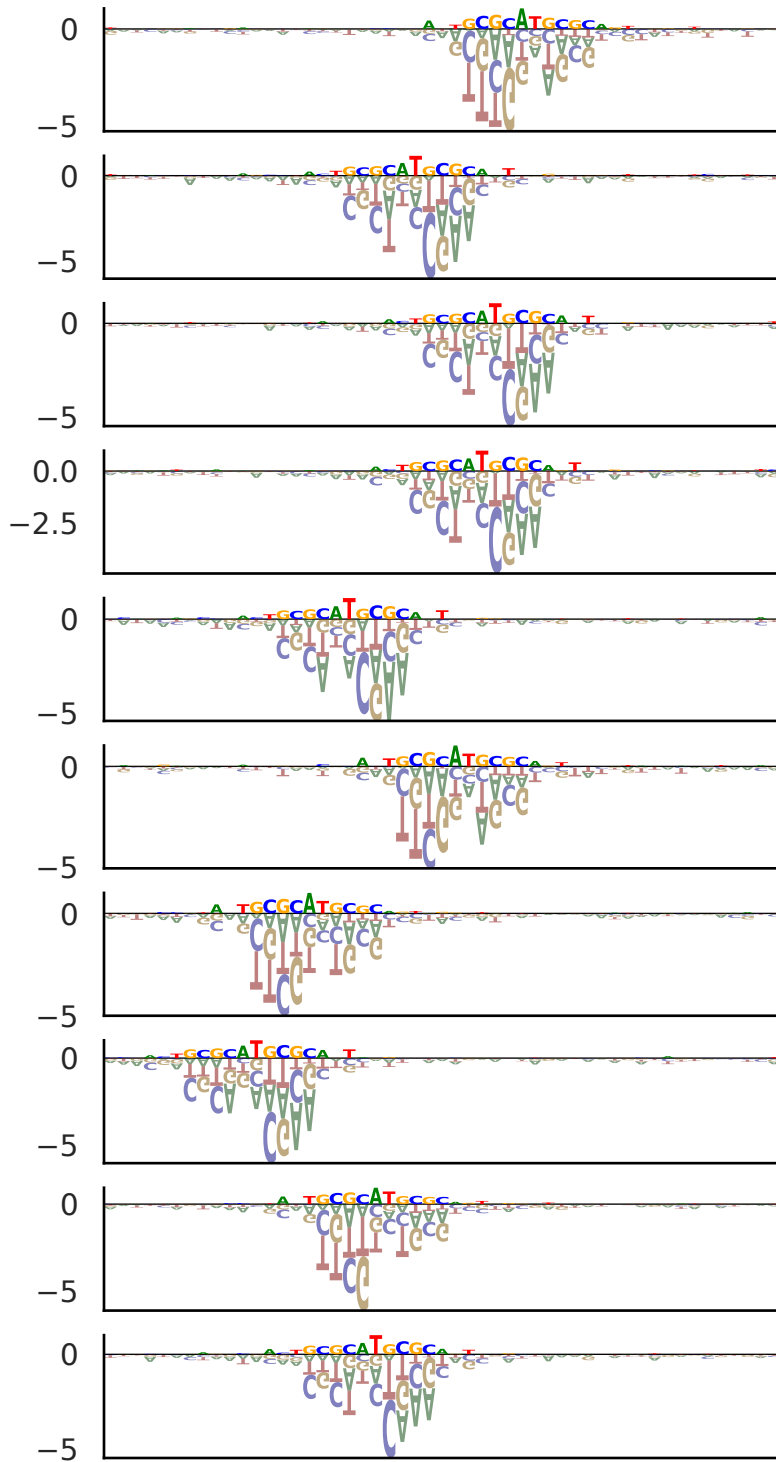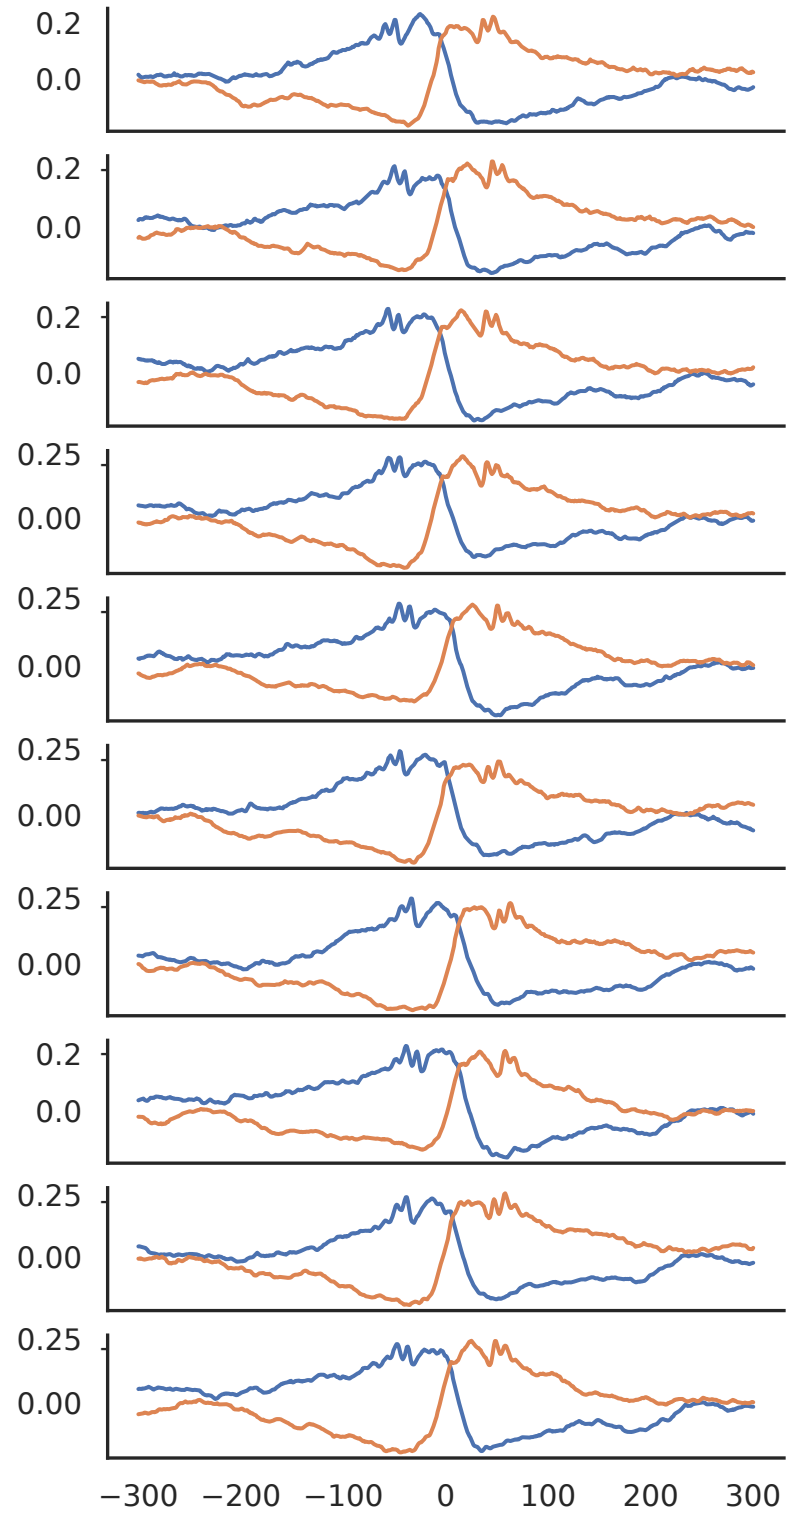



# CREB

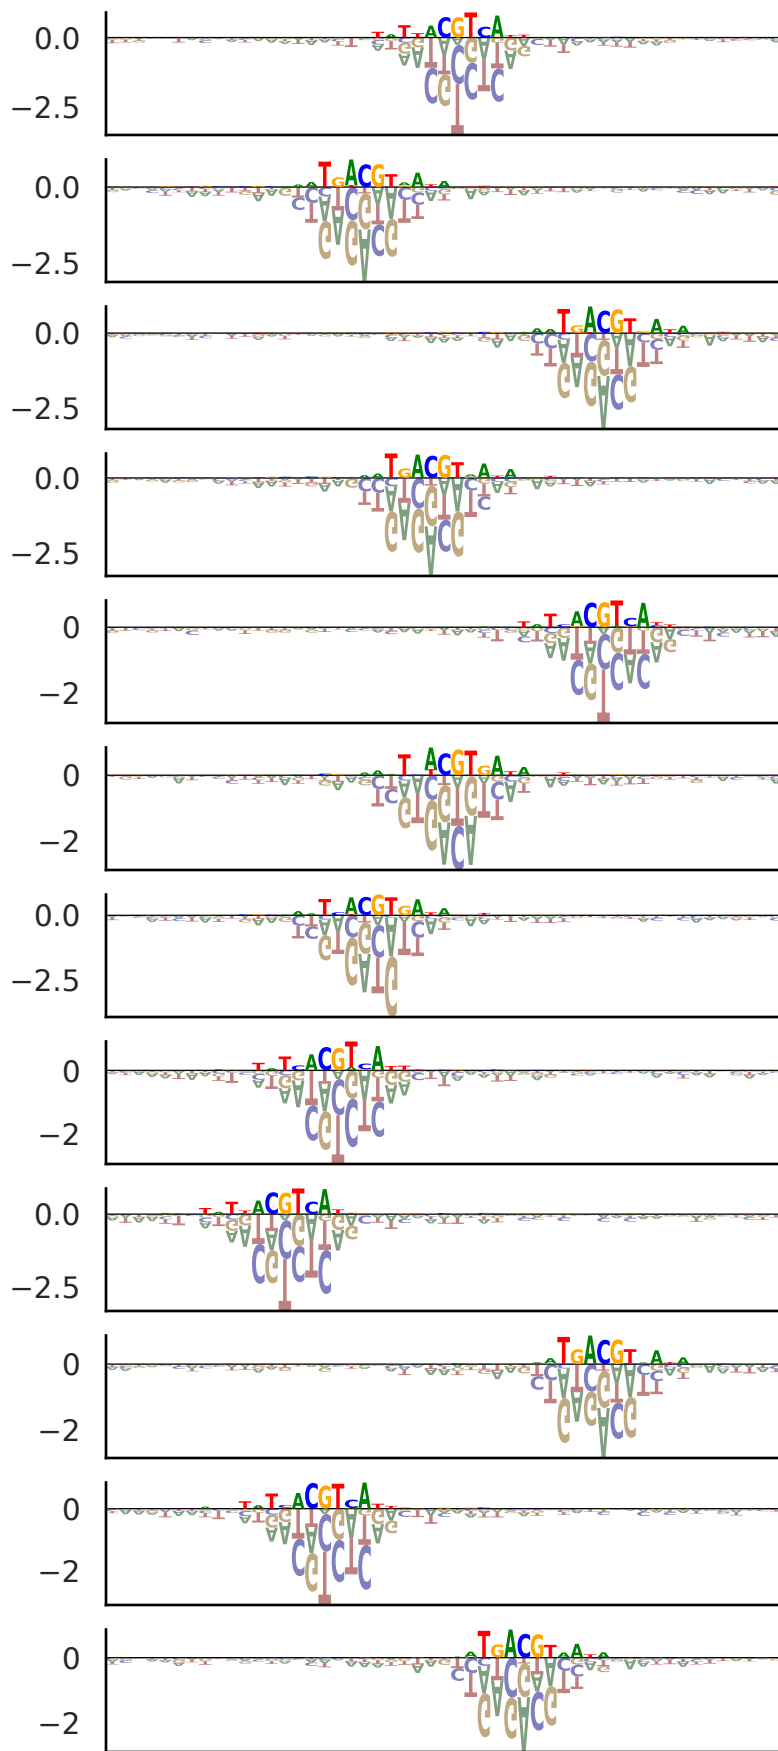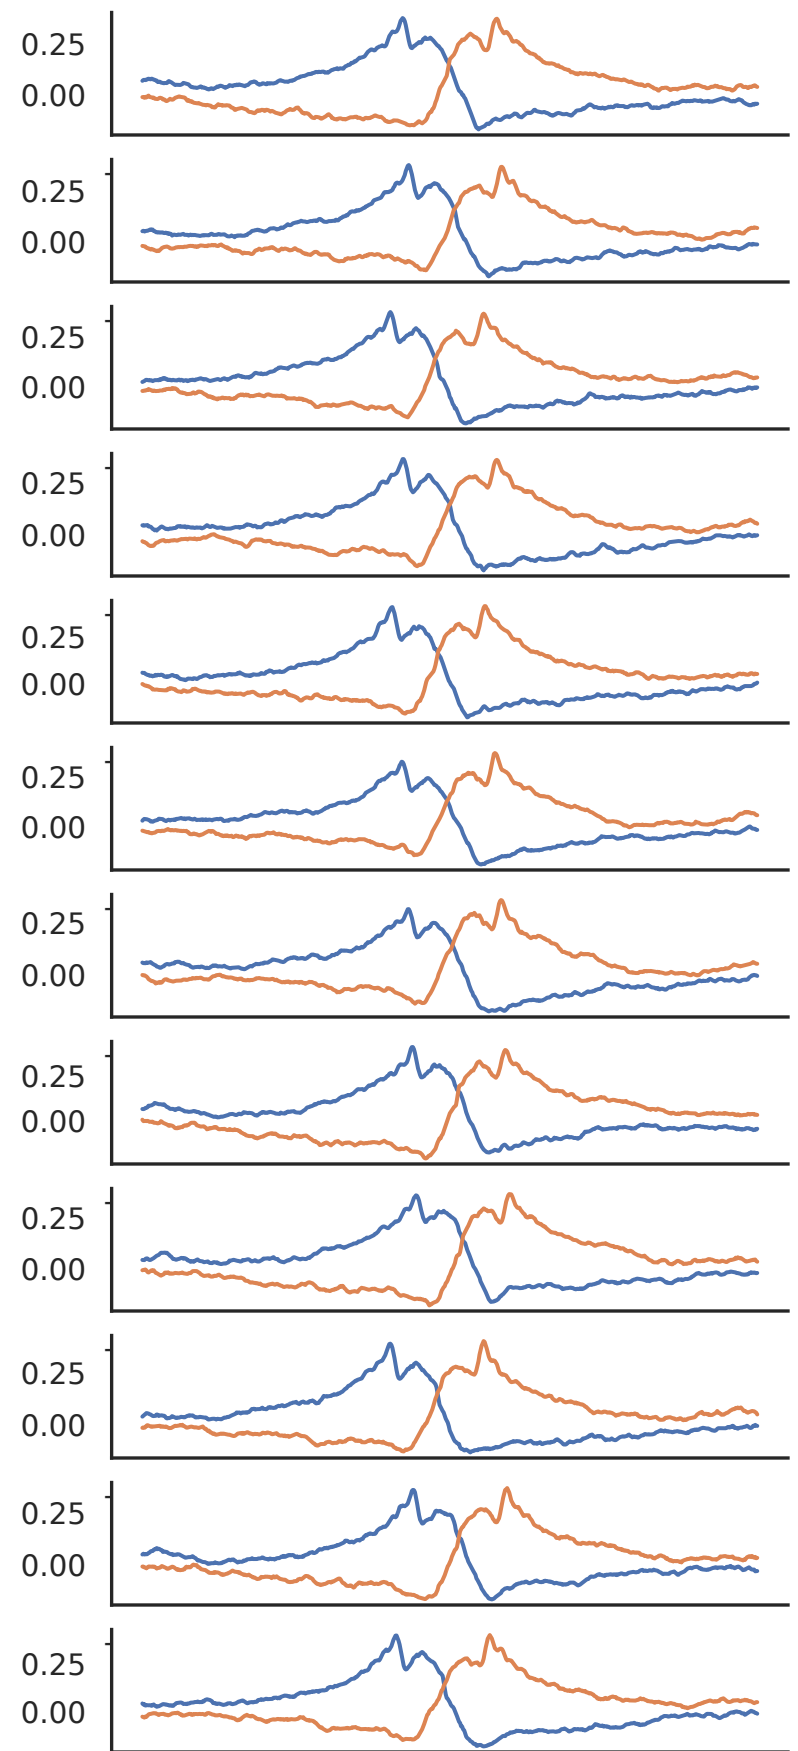

-300 -200 -100 0 100 200 300



# U1 snRNP

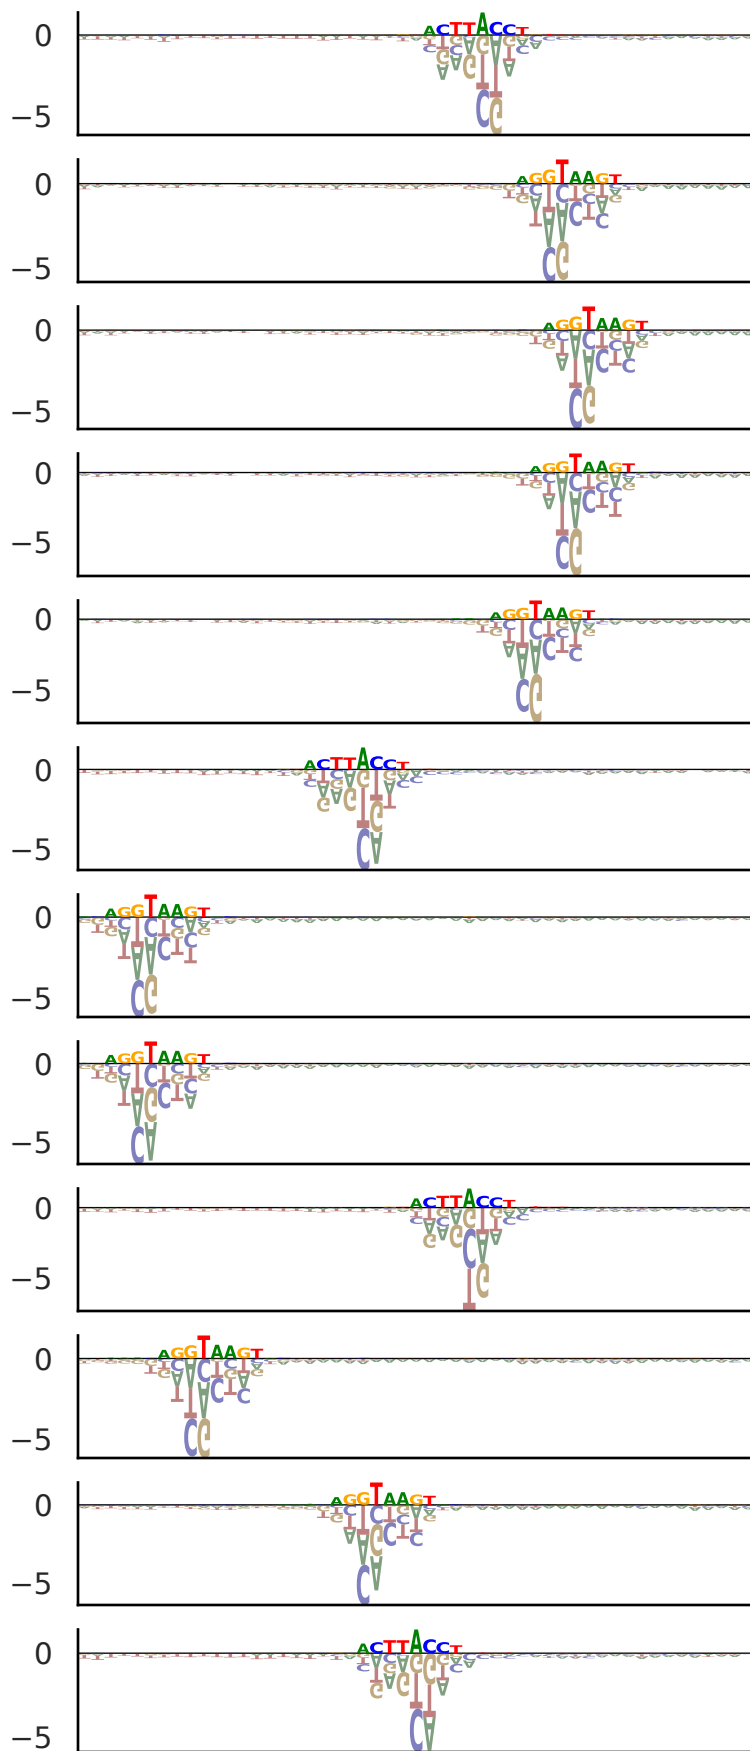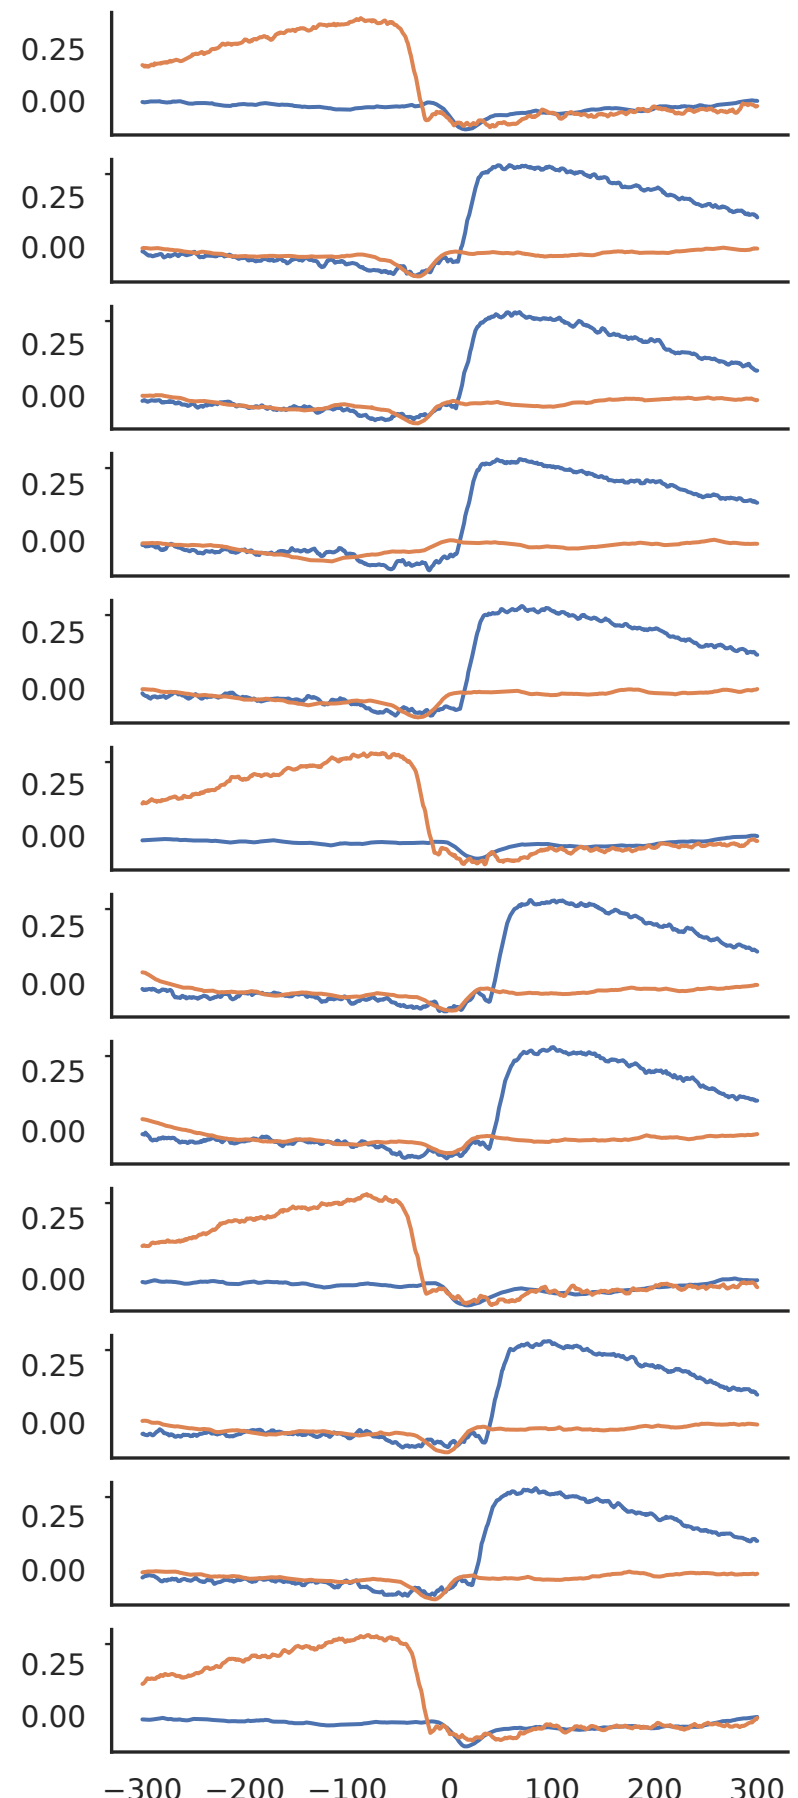

# Long Inr

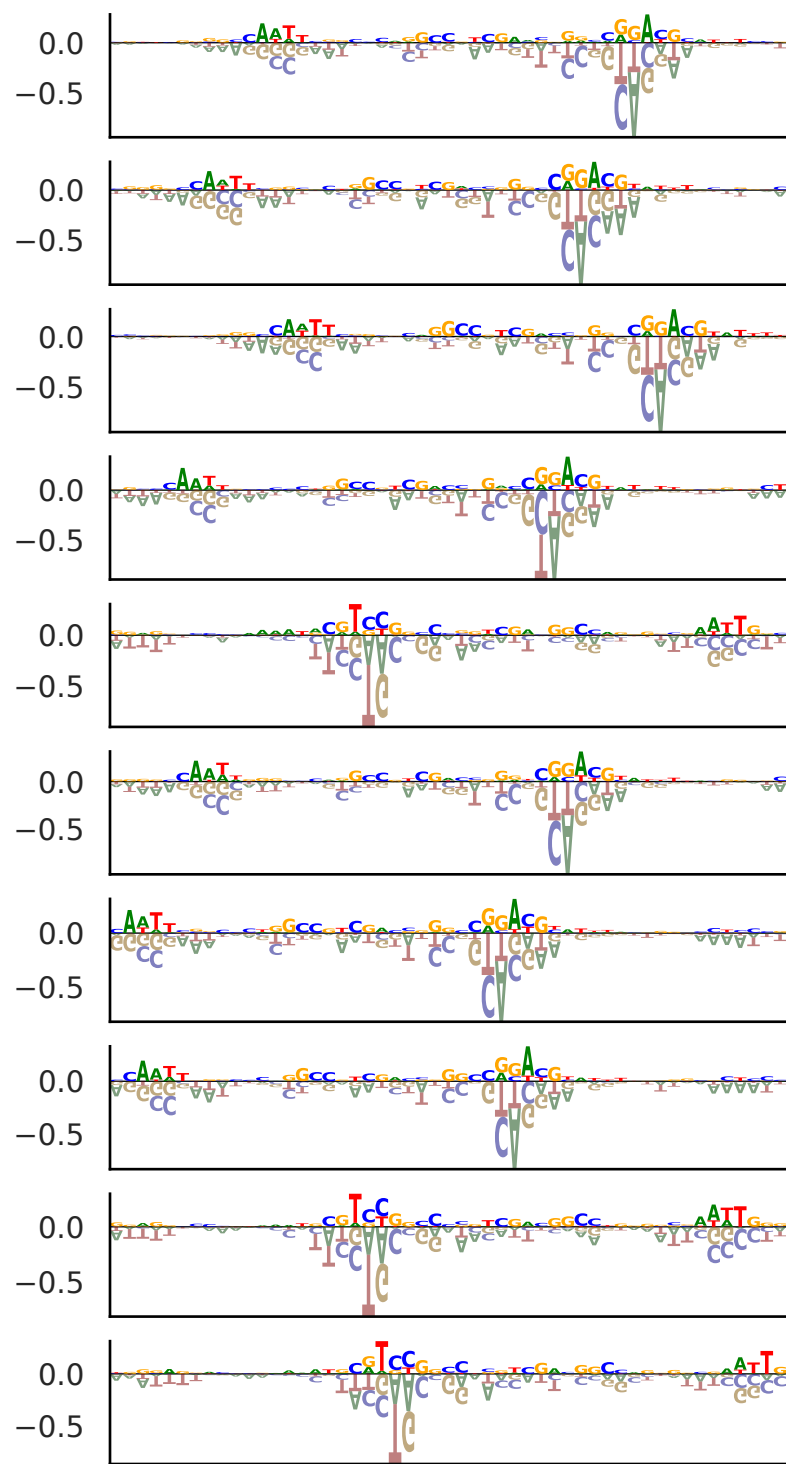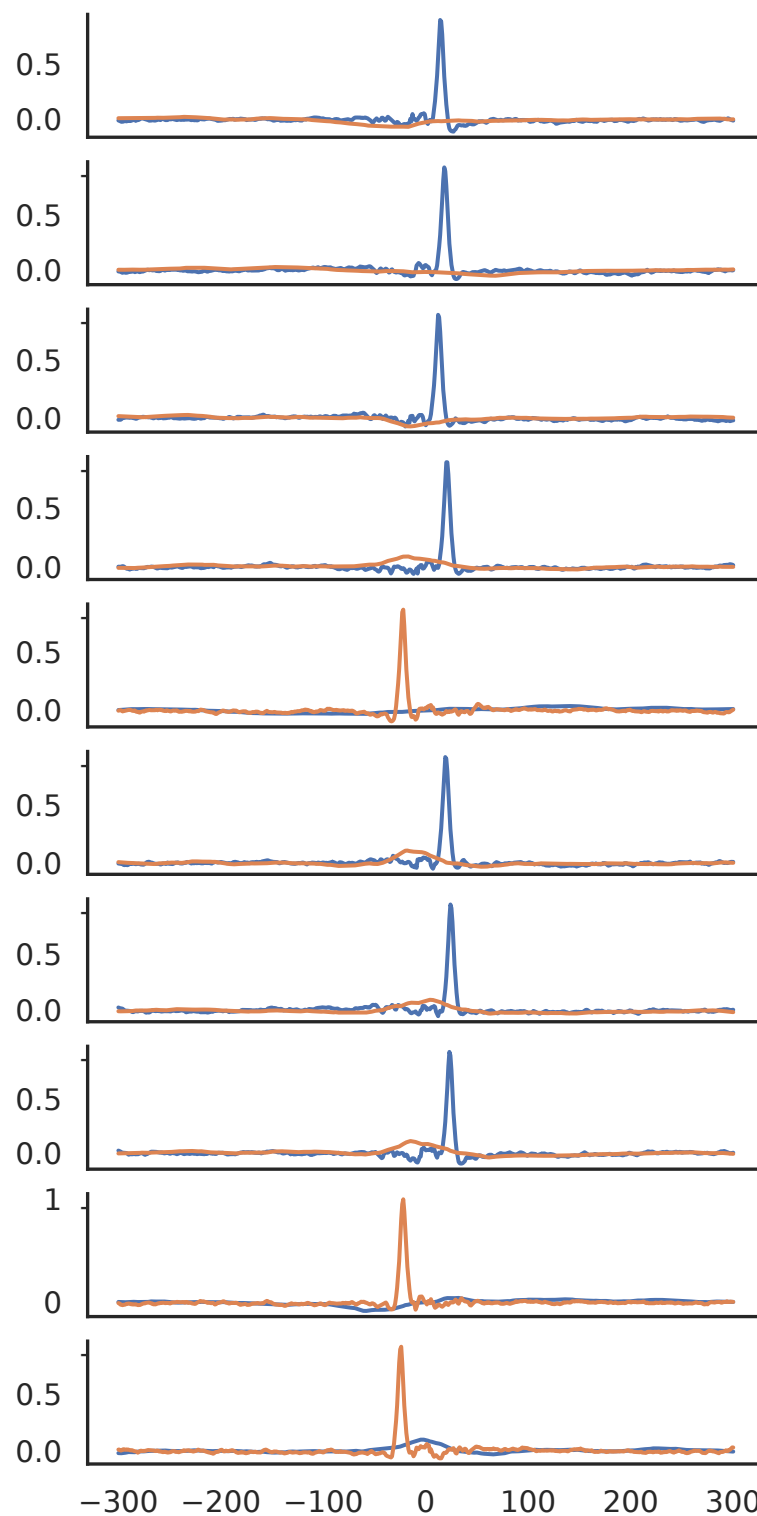

Supplement: NIHMS2002973-supplement-Data_S2.pdf [file NIHMS2002973-supplement-Data_S2.pdf]
