# Supplementary material
Source: PubMed Central journal article supplement (PMC11223672)
Supplement: NIHMS2002973-supplement-Data_S3.pdf [file NIHMS2002973-supplement-Data_S3.pdf]

# TATA

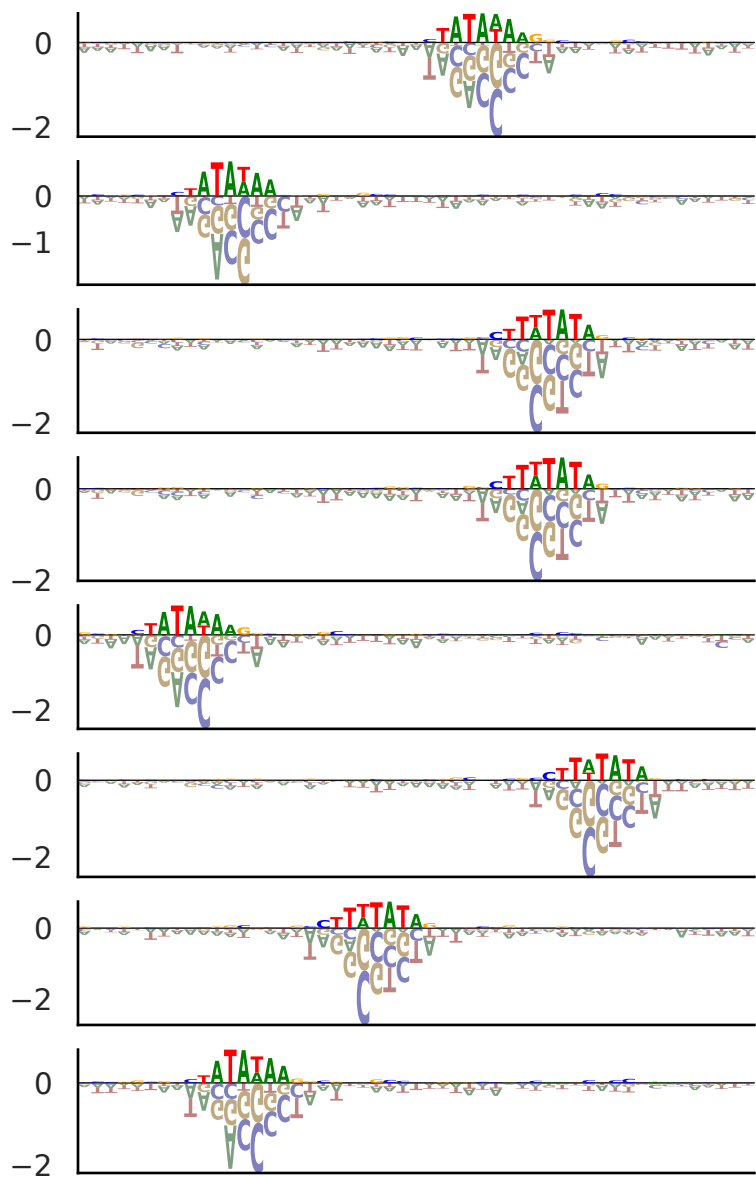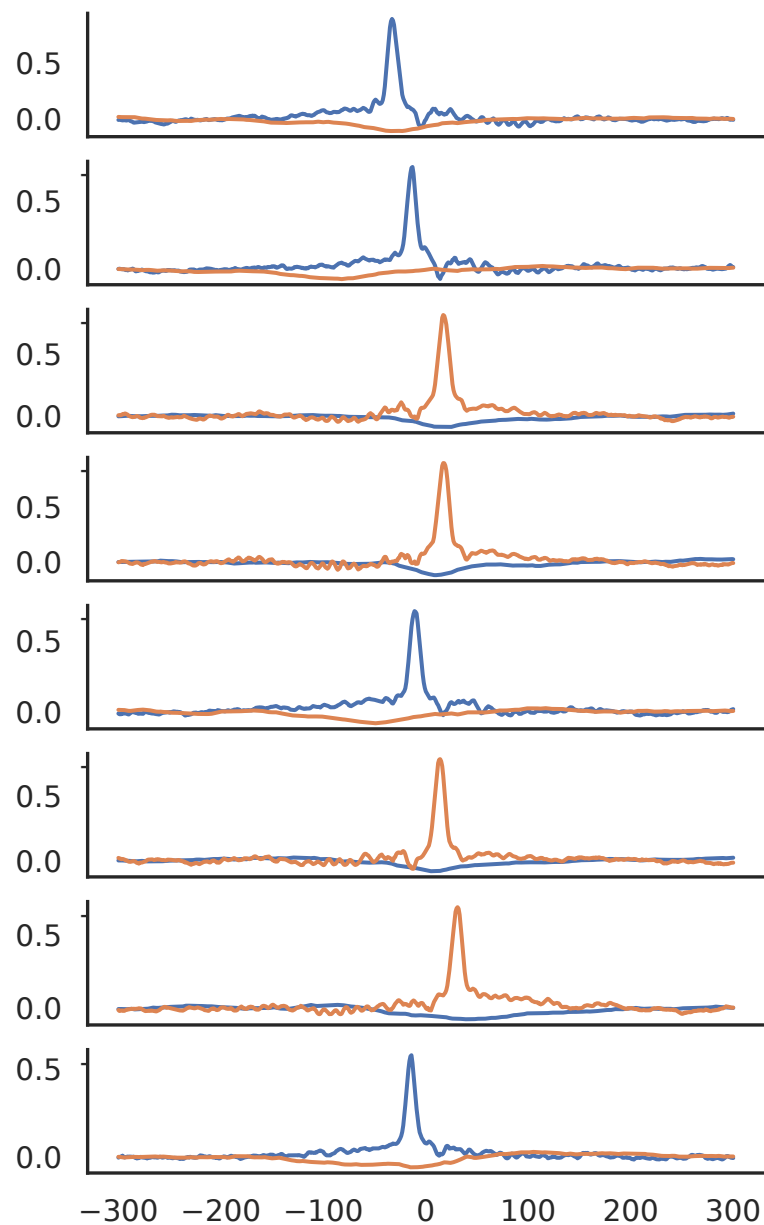

YY1

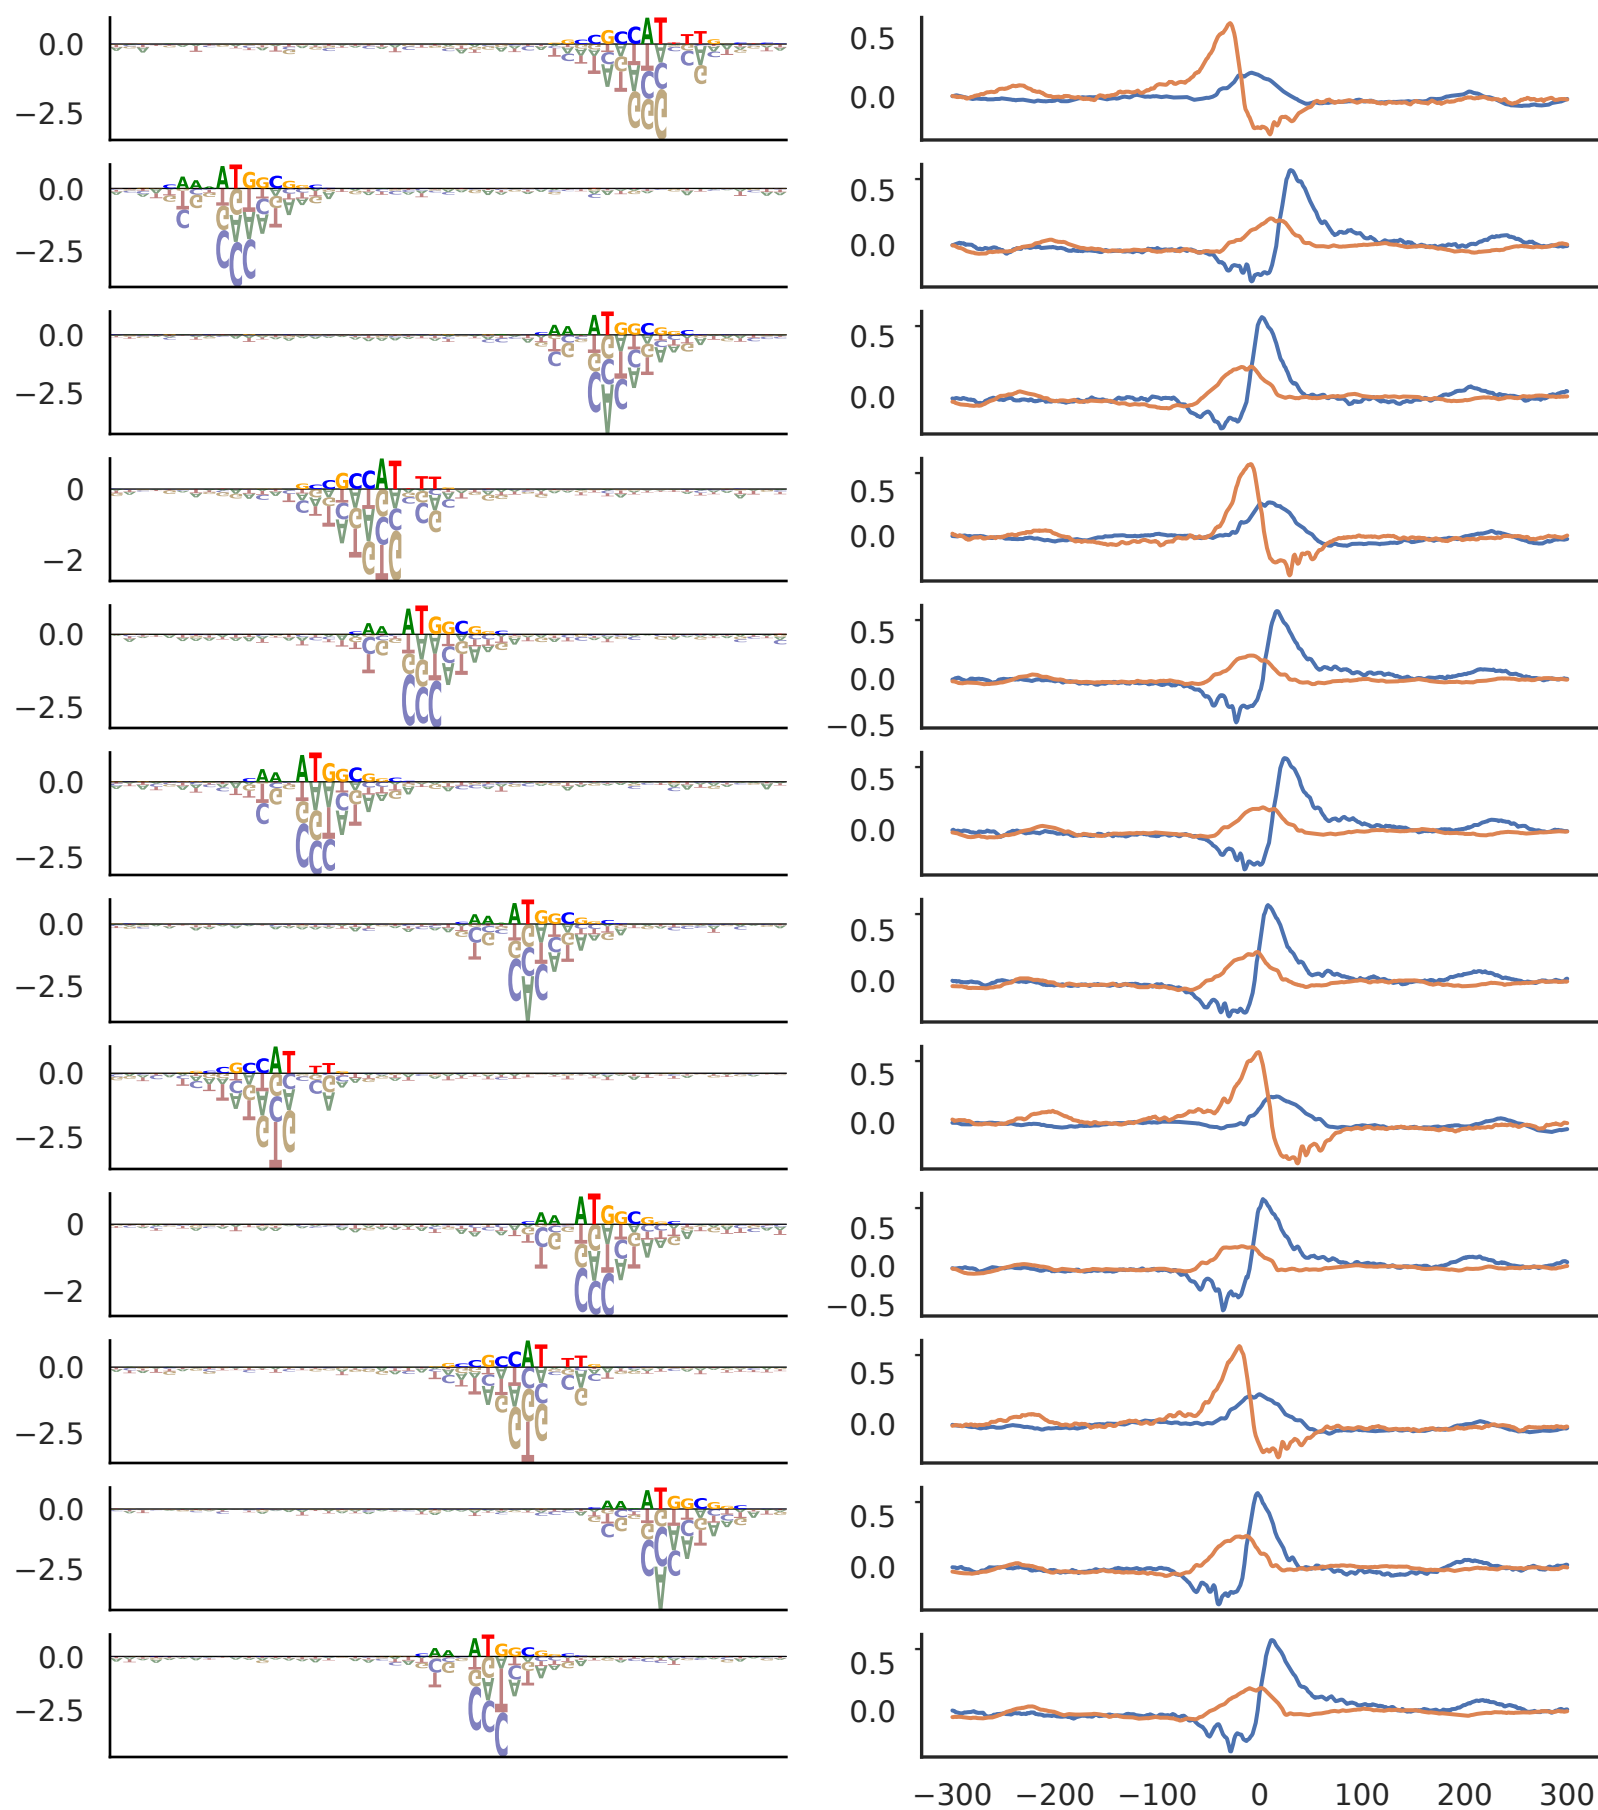

# NFY

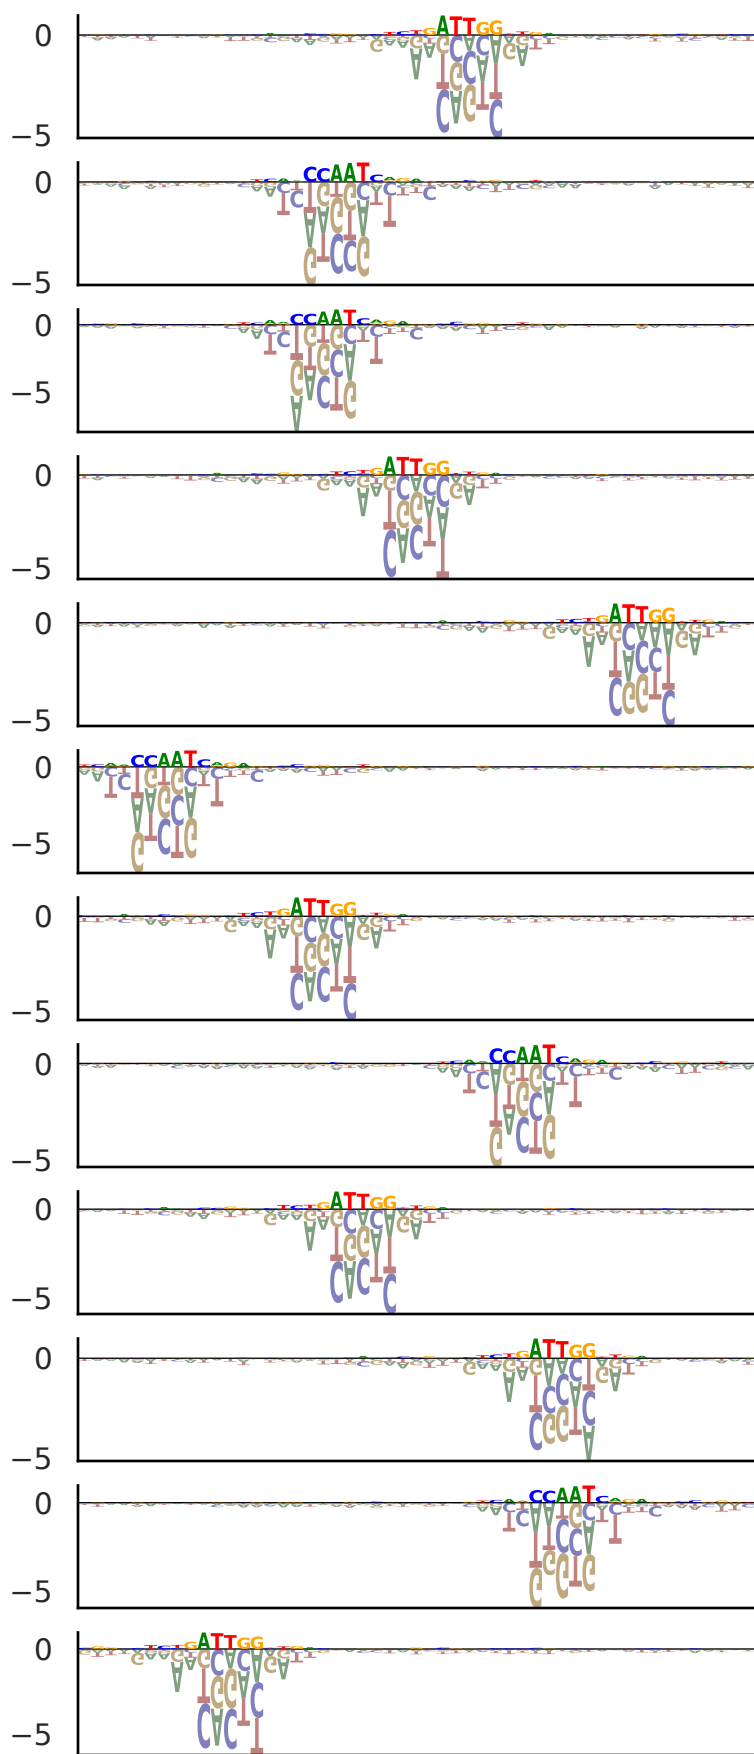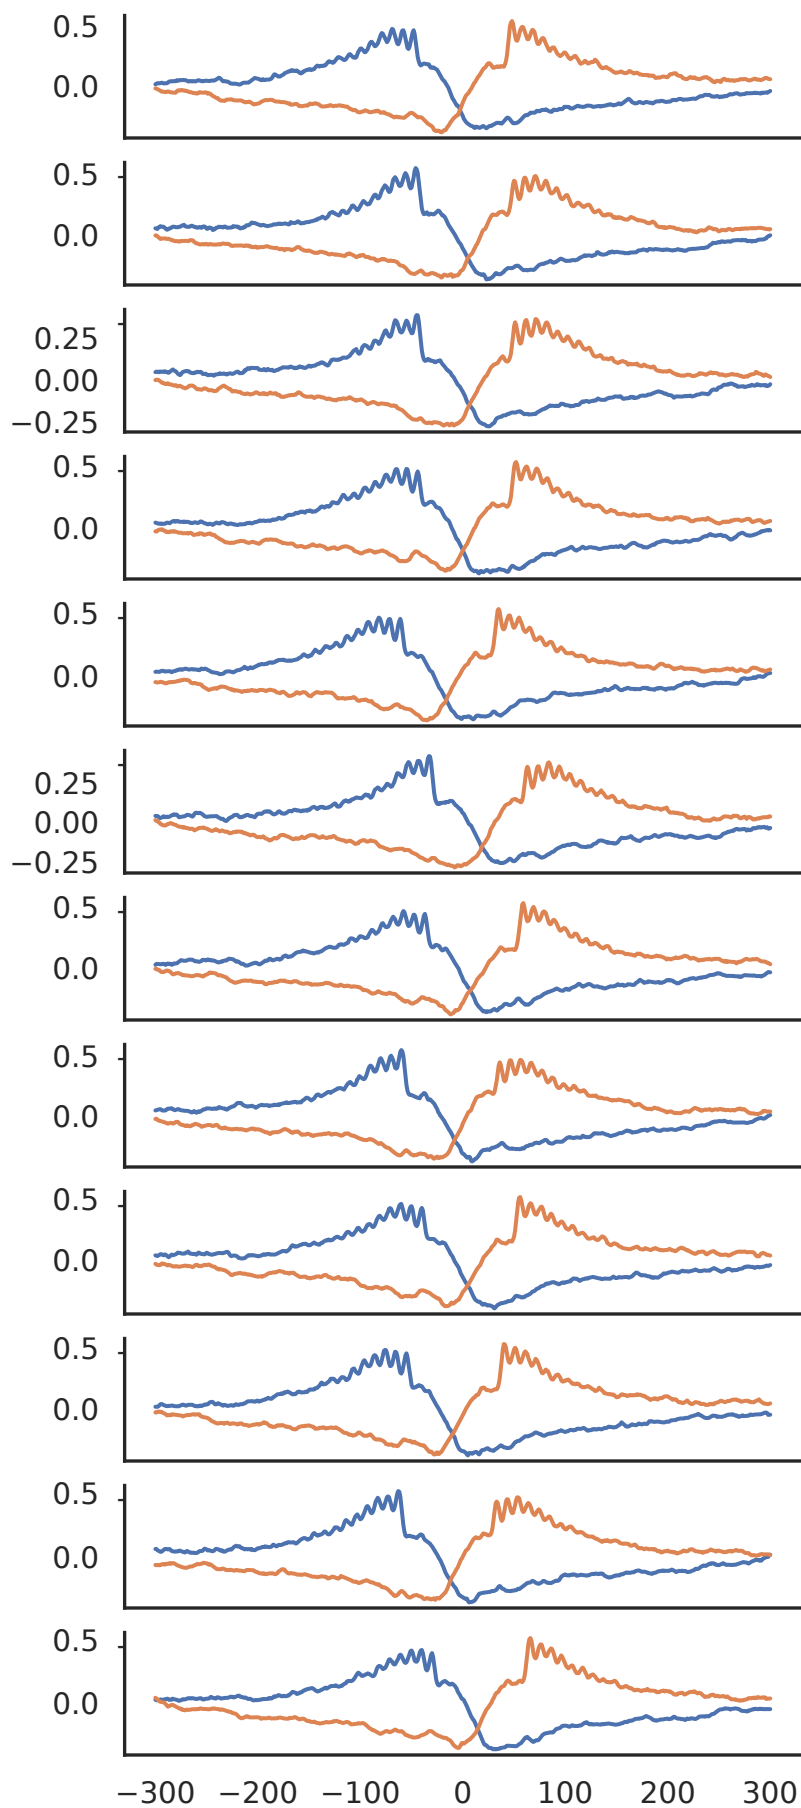

# ETS

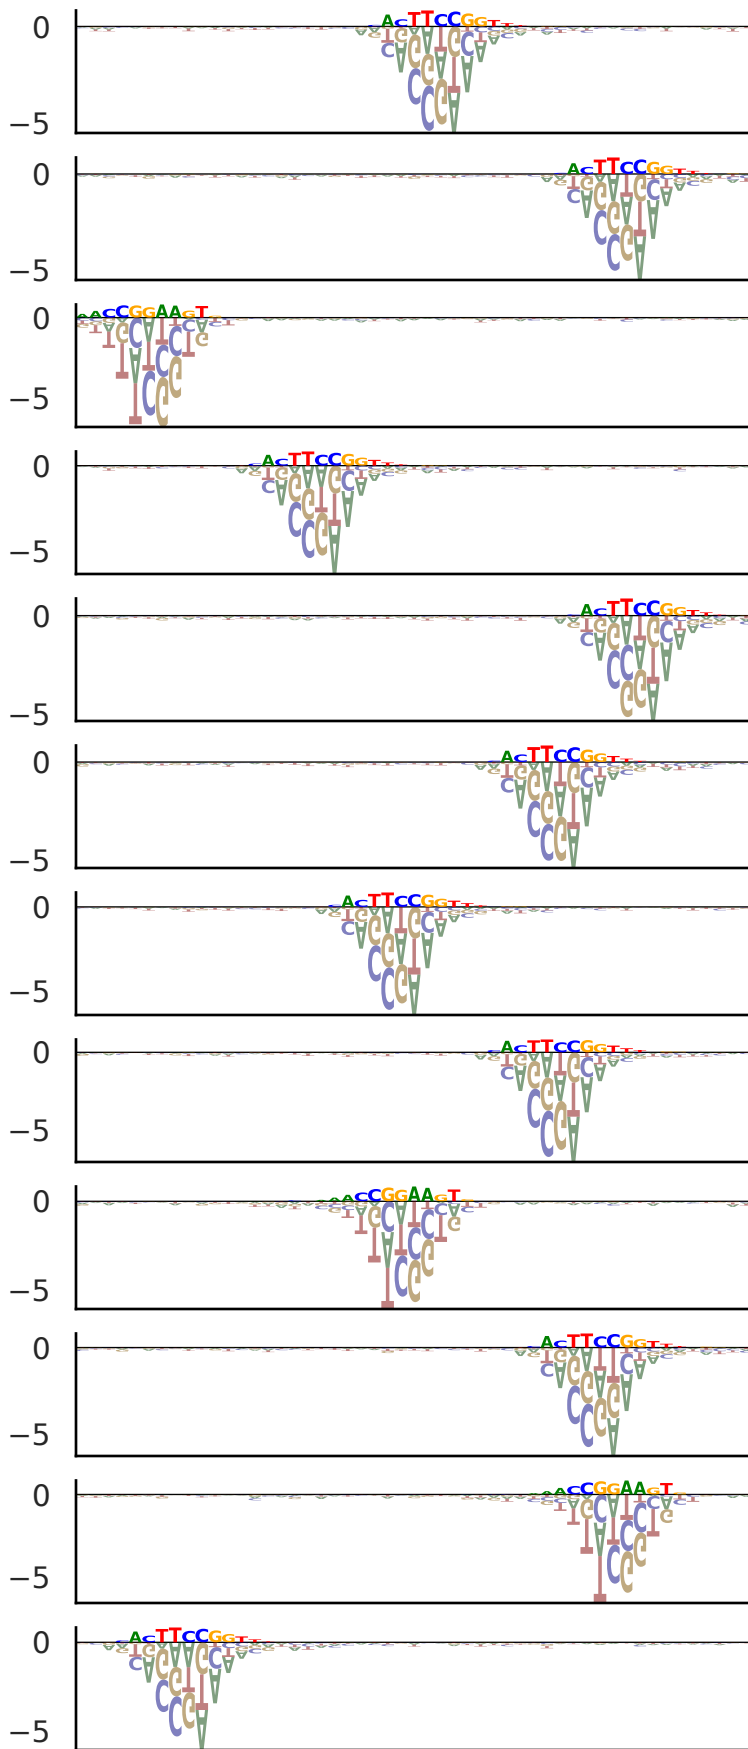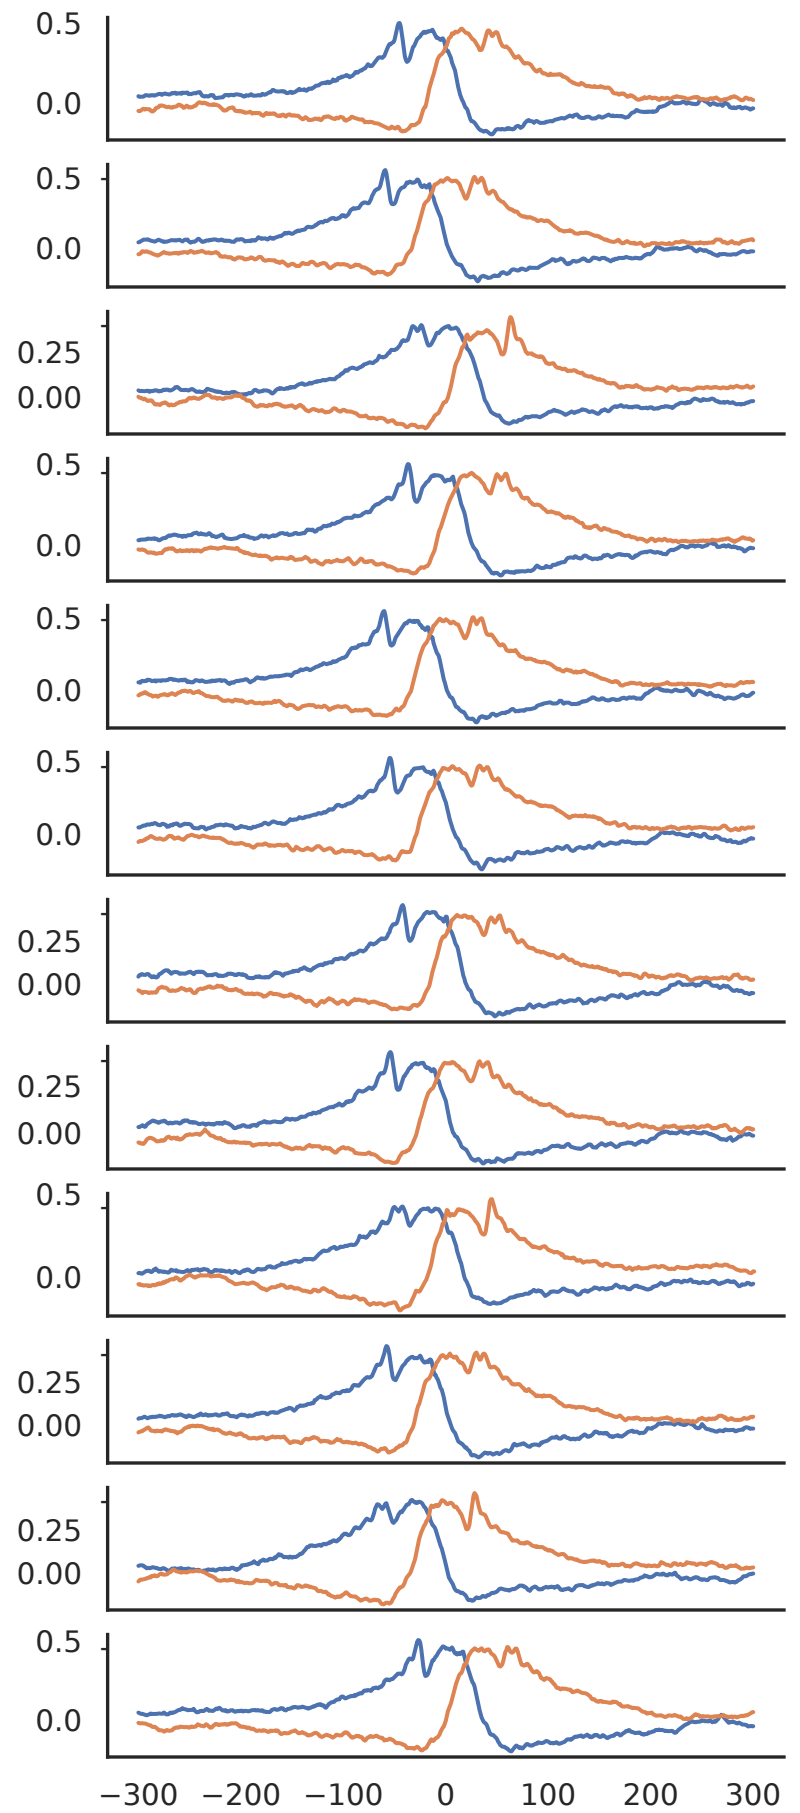

SP

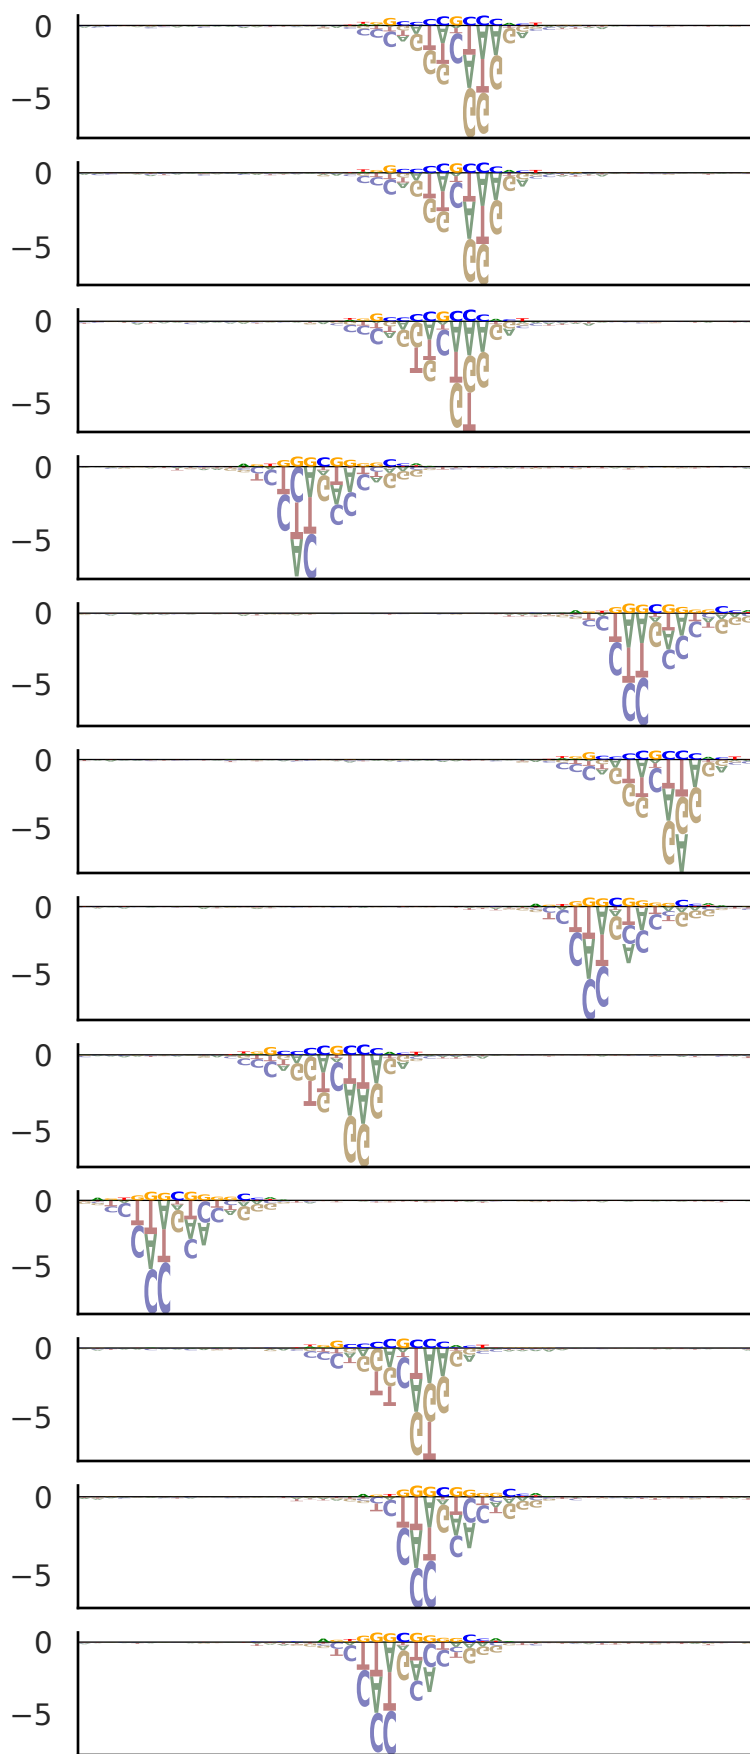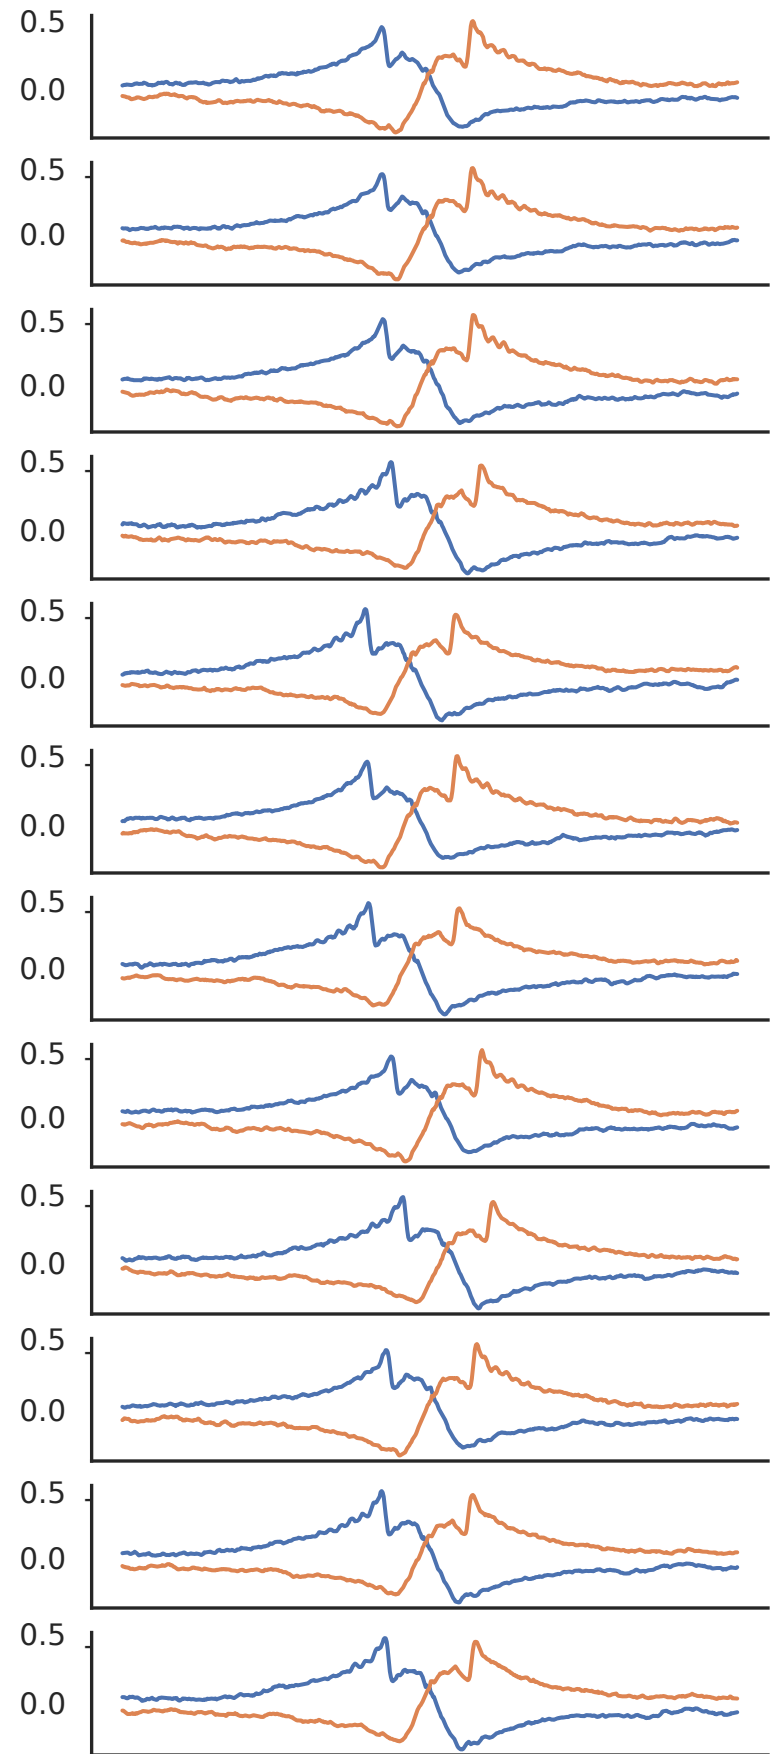

-300 -200 -100 0 100 200 300

# ZNF143

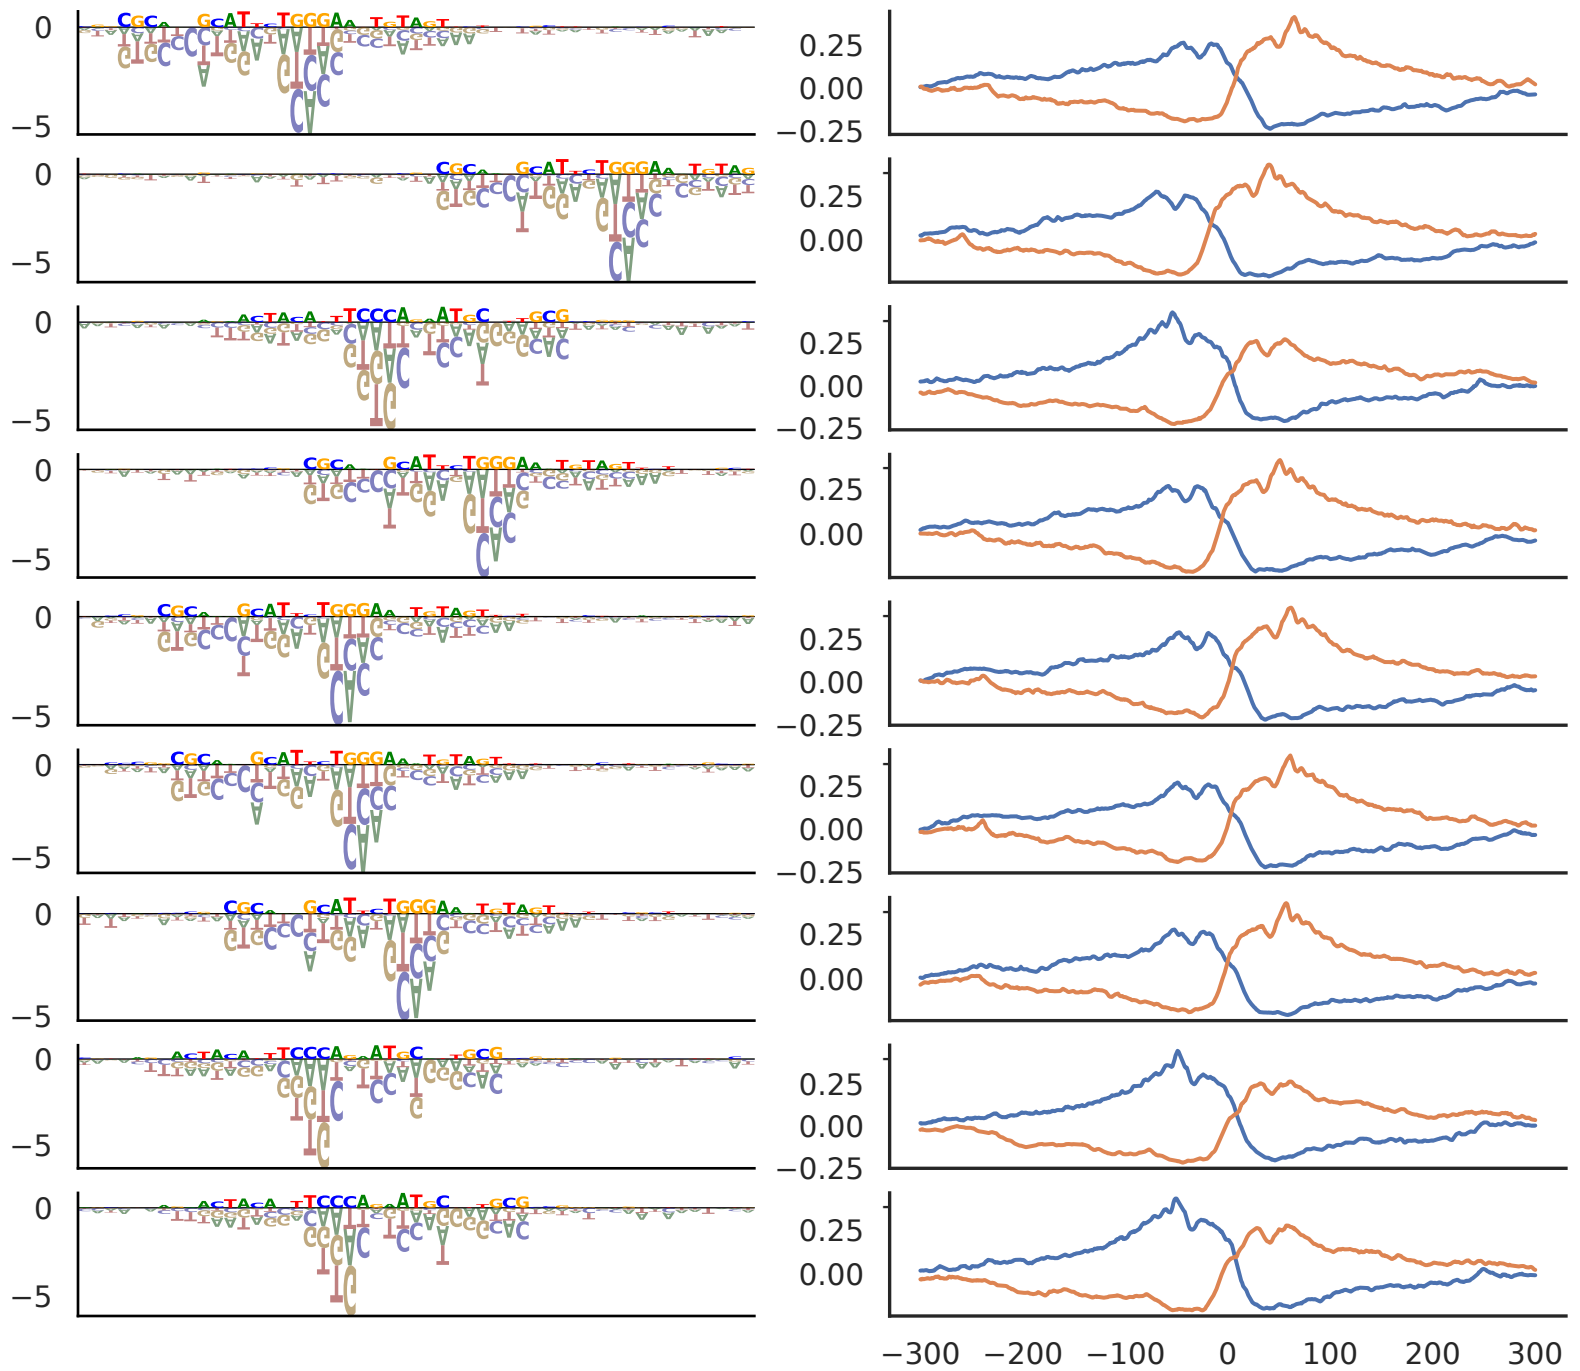

# NRF1

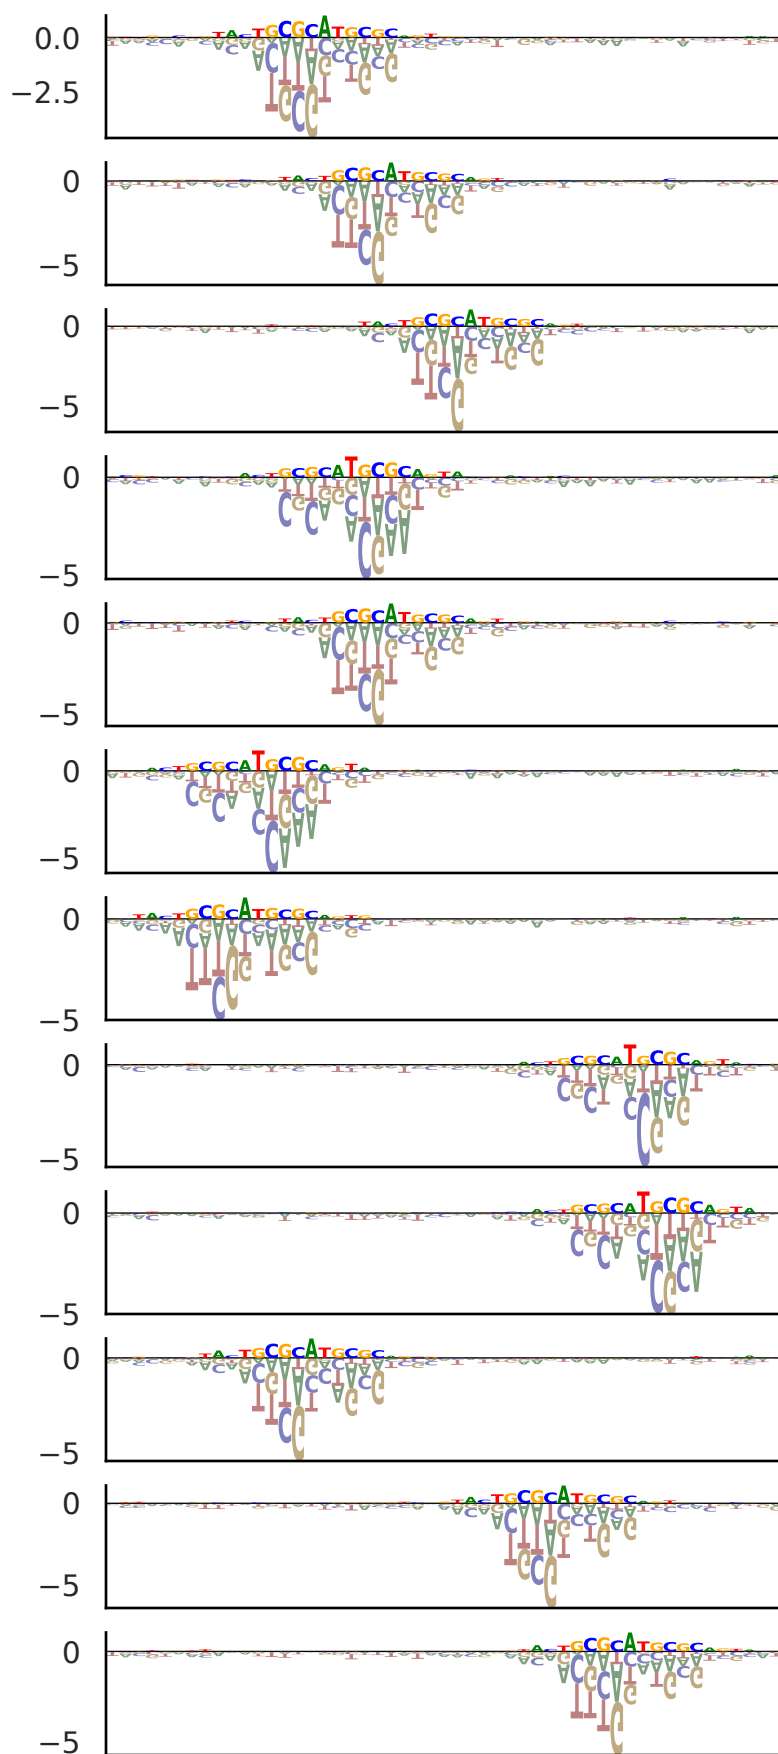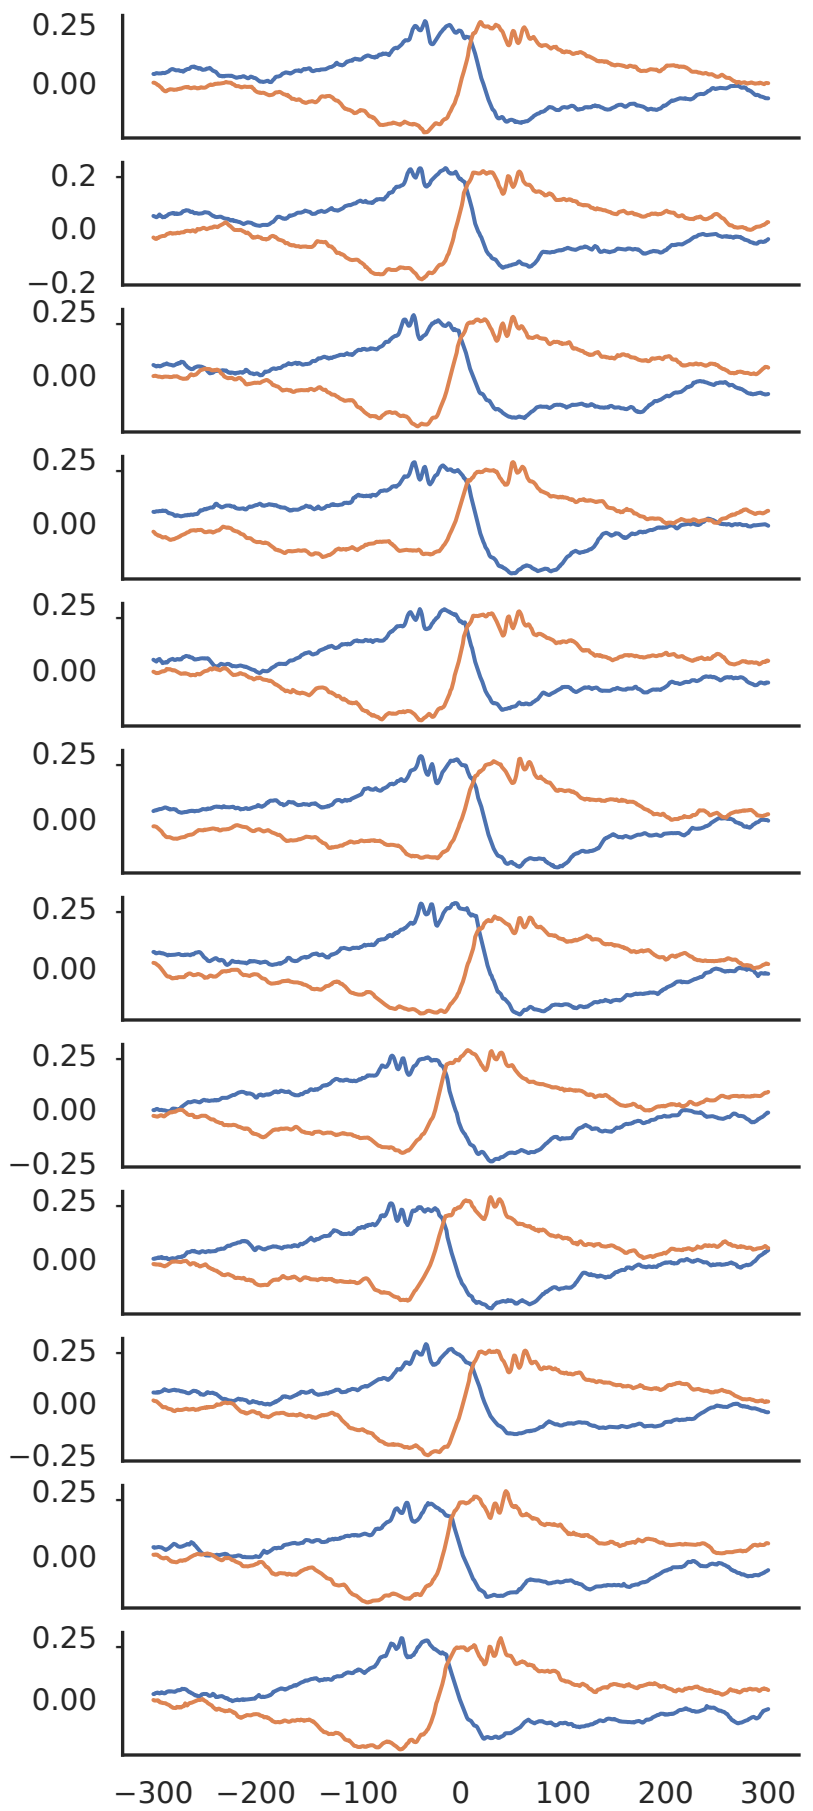

# CREB

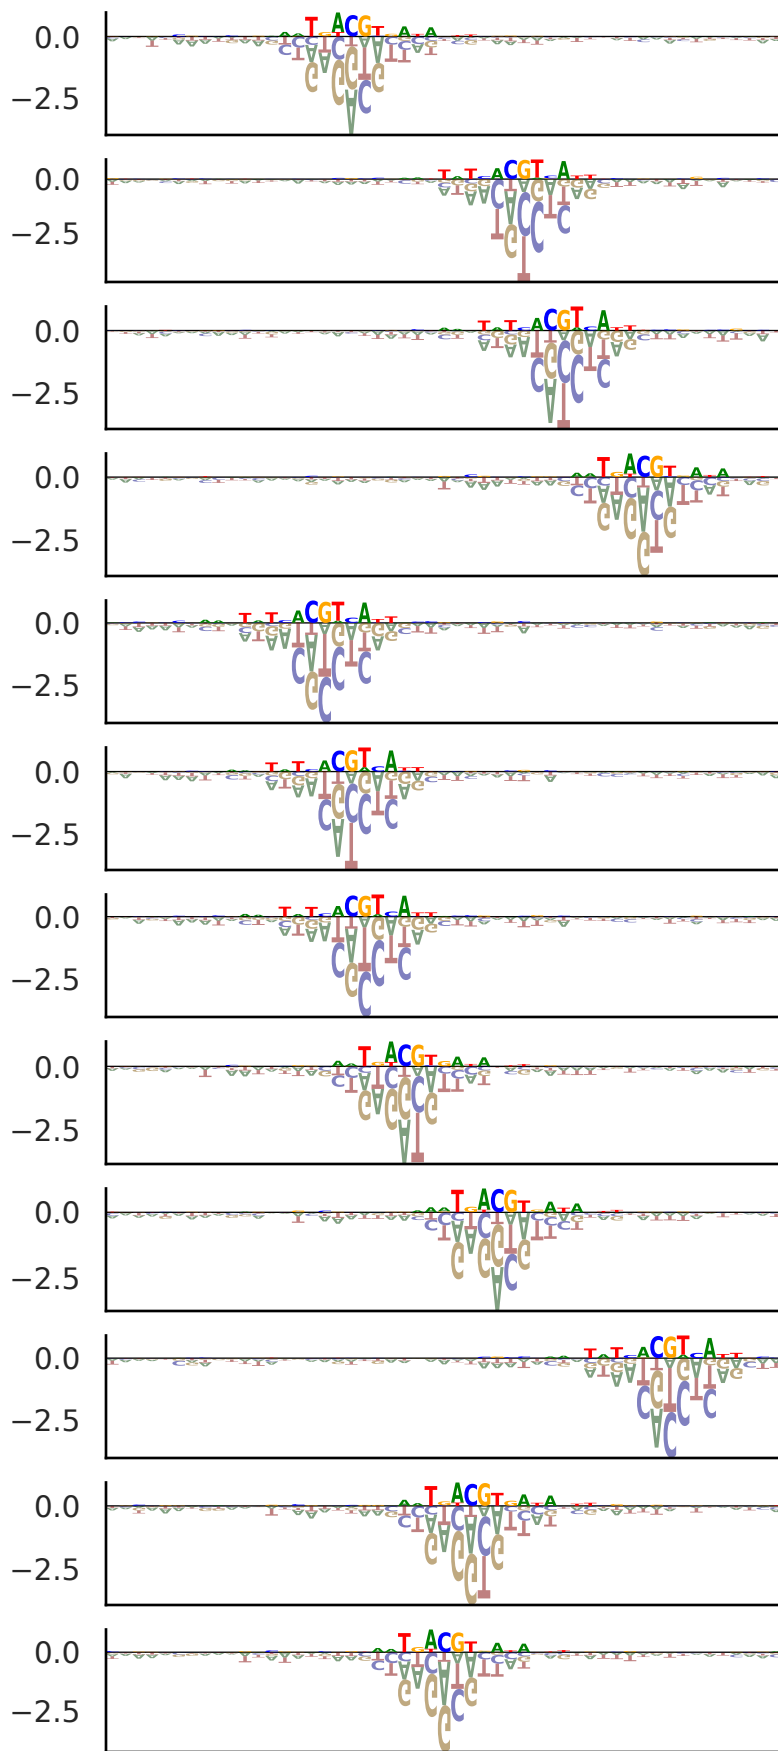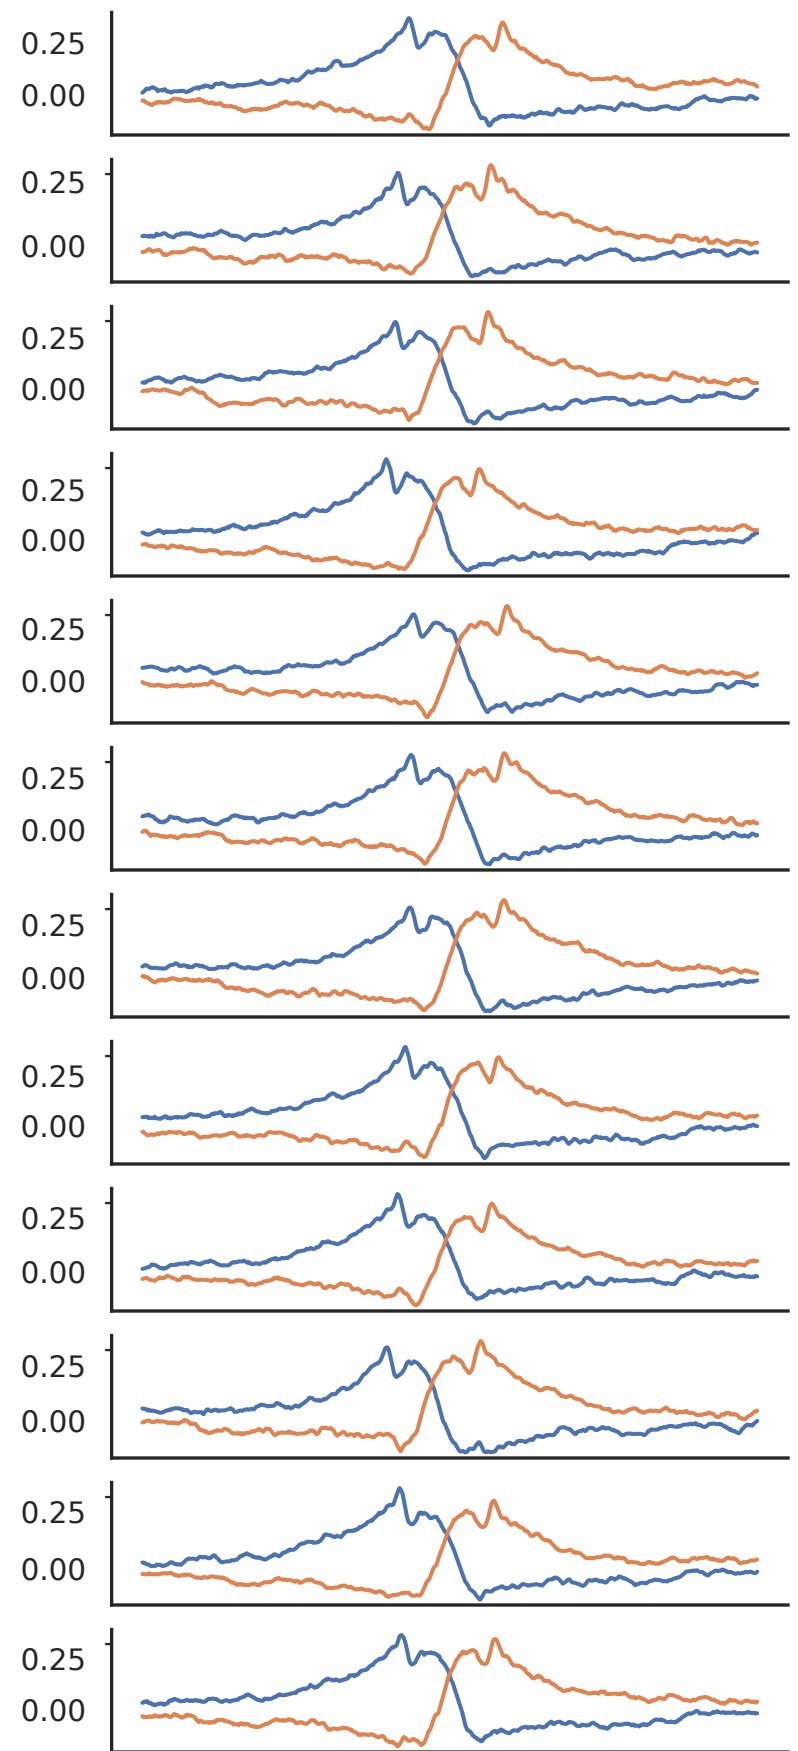

-300 -200 -100 0 100 200 300



# U1 snRNP

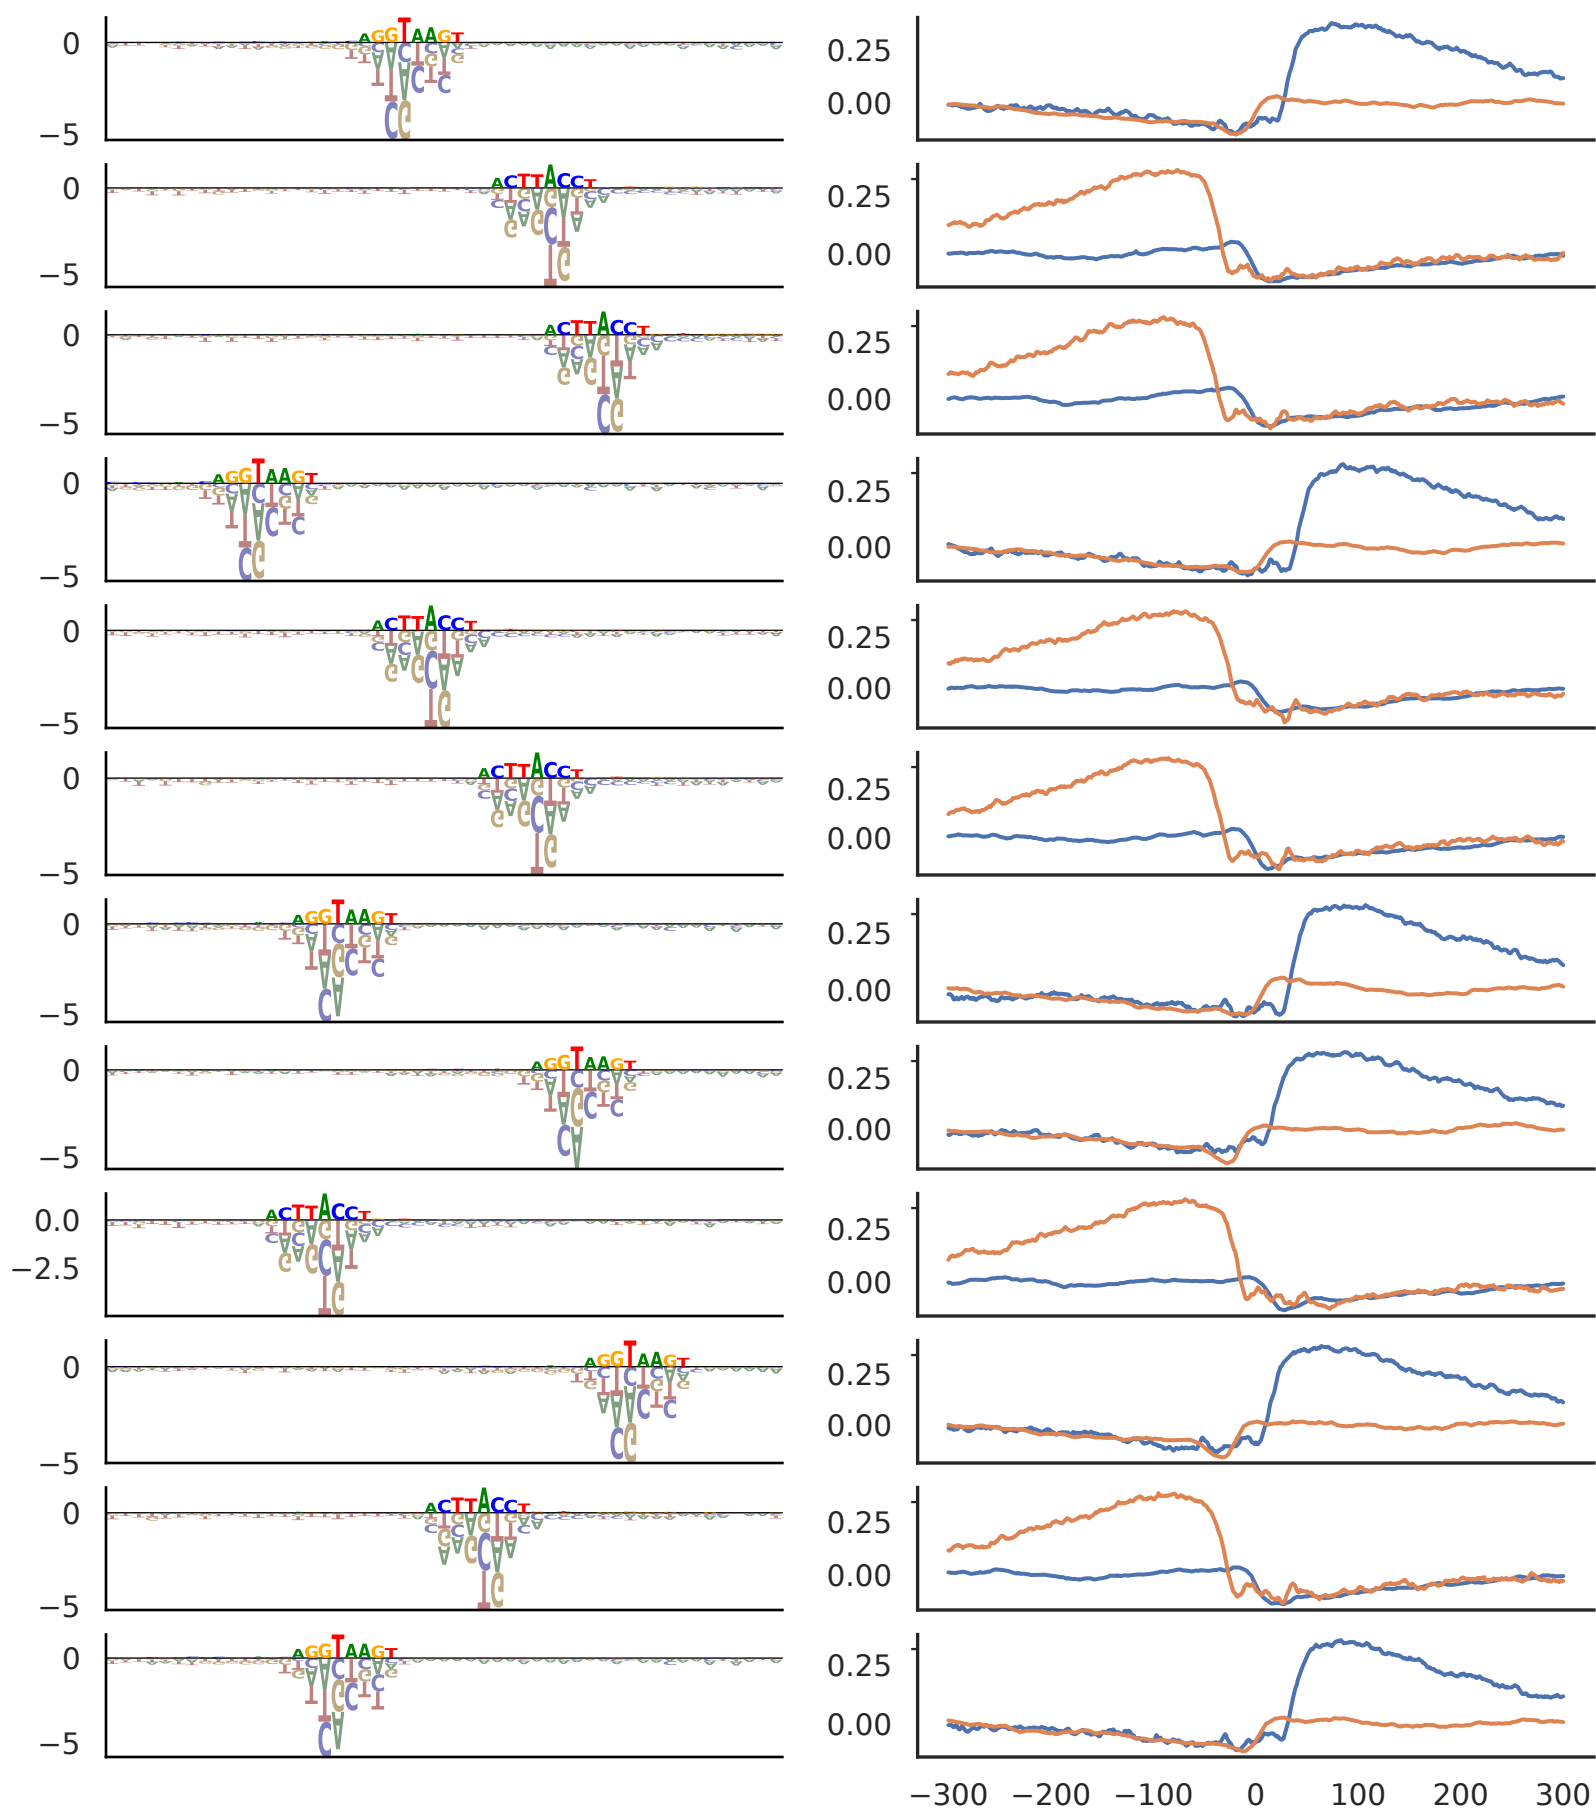

# Long Inr

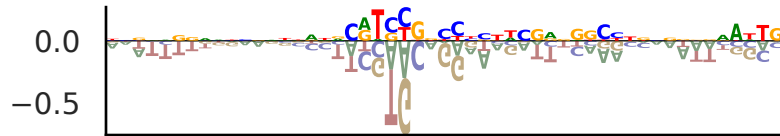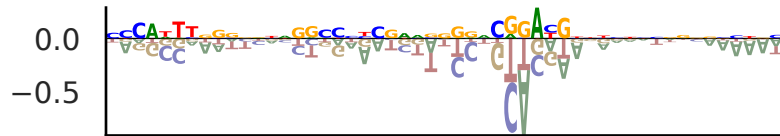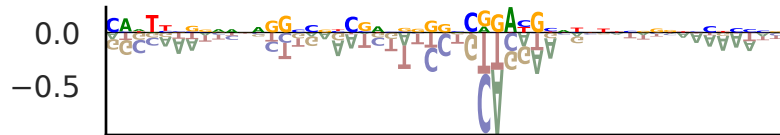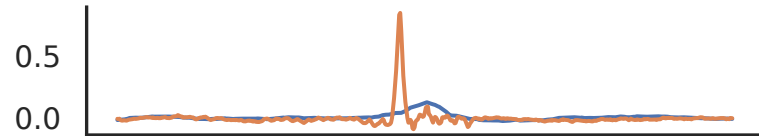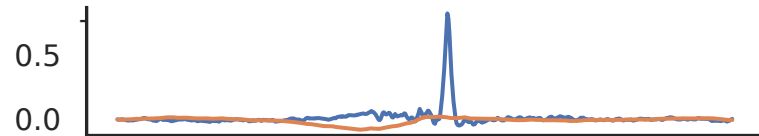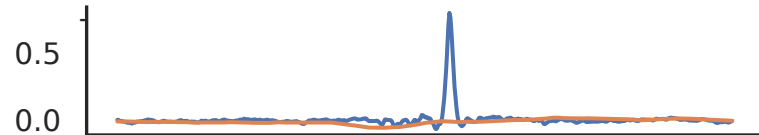

-300 -200 -100 0 100 200 300
